# Supplementary material for: Iron and oxygen vacancies co-modulated adsorption evolution and lattice oxygen dual-path mechanism for enhanced ampere-level freshwater/seawater oxidation
Source: Research Square preprint supplement (doi:10.21203/rs.3.rs-6367775/v1), 2025-04-14
Supplement: Supplementary file 1 [file 33da0b8aefbb9941a74702a0.docx]

Supporting information

**Iron and oxygen vacancies co-modulated adsorption evolution and lattice oxygen dual-path mechanism for enhanced ampere-level freshwater/seawater oxidation**

Xiwen Tao1, Li Hou 1, *, Xinyi Wang1, Jing Jin1, Huana Li1 and Faming Gao1, 2, *

1 Hebei Key Laboratory of Applied Chemistry, State Key Laboratory of Metastable Materials Science and Technology, Yanshan University, Qinhuangdao 066004, China

2 College of Chemical Engineering and Materials Science, Tianjin University of Science and Technology, Tianjin 300457, China

* Corresponding authors.

E-mail address: holy@ysu.edu.cn; fmgao@ysu.edu.cn

**Supplementary Notes**

**Preparation of Fe-Ni2P**

The treated NF was directly immersed in the 40 mL mixed solution containing 0.8 mmol Ni(NO3)2·6H2O, 1.2 mmol C6H5Na3O7 and 0.5 mmol K3Fe(CN)6 to synthesize the NiFe PBA. The Fe-Ni2P was obtained via the low-temperature phosphorization process under identical conditions.

**Preparation of MoNi4**

The as-prepared NiMoO4·xH2O was heated at 400 °C for 2 h in a H2/Ar (5:95) atmosphere, to synthesize the MoNi4 catalyst for HER.

**Preparation of Pt/C and RuO2 benchmarked catalysts**

20 mg commercial Pt/C or RuO2 powder was dispersed in a 2 mL mixture solution composed of 1.45 mL absolute ethanol, 0.5 mL isopropanol, and 0.05 mL Nafion solution. The homogeneous ink was obtained under ultrasonication for 2 h, and dropped upon two clean NF, respectively. Then, the Pt/C and RuO2 catalysts loading on NF were prepared after drying in a vacuum oven at 60 °C for 12 h.

**Material characterizations**

The crystalline phase of all catalysts was measured via powder XRD using a D/Max-2500/PC X-ray diffractometer with Cu Kα radiation (λ = 1.5418 Å) over an angle (2θ) range from 5 to 80 degree under the scanning rate of 5 °/min. Raman spectra were recorded on a Renishaw inVia laser Raman spectrometer with a laser excitation of 532 nm. XPS test was performed on the ESCALab MKII X-ray photoelectron spectrometer equipped with Al Kα X-ray radiation as the excitation source. The morphology and microstructure of the samples were characterized via Field-emission Scanning Electron Microscopy (FESEM, Zeiss SUPRA 55), Transmission Electron Microscopy (TEM, Hitachi-7700), High-Resolution Transmission Electron Microscopy (HRTEM, FEI TALOS F200) combined with High-angle annular darkfield-scanning transmission electron microscopy (HAADF-STEM) and energy-dispersive X-ray spectroscopy (EDS).

**Electrochemical measurements**

Unless specified, all electrochemical measurements were performed on the Corrtest CS310MA electrochemical workstation (Wuhan Corrtest Instruments Corp., Ltd) at room temperature, constructing a three-electrode system in 1 M KOH, 1 M KOH + 0.5 M NaCl (simulated alkaline seawater), and 1 M KOH + seawater (alkaline seawater) electrolyte. The as-prepared catalysts were directly applied as the working electrode with 1 × 1 cm2 immersing area in the electrolyte. A standard Hg/HgO electrode and a graphite rod (purity: 99%) were used as the reference electrode and the counter electrode, respectively. Linear sweep voltammetry (LSV) was operated under a scanning rate of 5 mV s-1. All the potentials in LSV were iR-compensated (compensation level: 90%), and the resistance (Rs) for iR-compensation was tested at the open circuit potential (OCP). The in-situ electrochemical impedance spectroscopy (EIS) was operated from 100 kHz to 0.01 Hz at a serious voltage with a small amplitude (30 mV). The durability tests were performed by chronopotentiometry (CP) at the current density of 1.0 A cm-2. Cyclic voltammetry (CV) was operated at the potential range of 0.30 to 0.40 V vs. Hg/HgO with a series scanning rate of 20, 40, 60, 80, and 100 mV s-1. The electric double-layer capacitance (Cdl) was calculated by the current density difference (Δj/2) in the center of the potential range under different scanning rates. ECSA was established by the following equation:

Where the specific capacity is 0.04 mF cm-2 in 1 M KOH electrolyte, and is the geometric area of working electrode soaking in the electrolyte (1 × 1 cm2).

All measured potentials vs. Hg/HgO were converted to reversible hydrogen electrode (RHE) by the Nernst equation in addition to special note:

Overall water splitting (OWS) measurements were tested under a two-electrode system. The as-synthesized Fe-Ni2P/NiMoO4 was used as the anode for OER, while the MoNi4 served as the cathode for HER. For the performance comparison, the as-prepared commercial Pt/C and RuO2 catalysts were employed as cathodes for HER and anode for OER, respectively. LSV curves of OWS were measured in 1 M KOH, 1 M KOH + 0.5 M NaCl, and 1 M KOH + seawater electrolyte at a sweeping rate of 5 mV s-1 with 90% IR compensation. The durability of the catalyst was tested via chronopotentiometry (CP) at a constant current density of 1.0 A cm-2.

**In-situ Raman measurements**

The in-situ Raman spectra were collected by a Renishaw inVia laser Raman spectrometer with a laser excitation of 532 nm. The as-prepared catalysts were used as the work electrodes, with an Ag/AgCl and a graphite rod as the reference and counter electrodes, respectively. The N2-saturated 0.1 M KOH was employed as the electrolyte to slow down the gas bubble production under OER potentials. The Raman spectra were obtained on the multi-potential steps test, which was conducted on CHI 760E electrochemical workstation (Shanghai Chenhua Instrument Co., Ltd), with the potential windows from 1.20 to 1.50 V vs. RHE.

**In-situ ATR-SEIRAS measurements**

The surface-enhanced infrared absorption spectroscopy (SEIRAS) with attenuated total reflection (ATR) was employed to detect the intermediates of the OER process. The electrochemical ATR-SEIRAS measurements were used on the Thermo Nicolet 8700 spectrometer equipped with the mercury-cadmium-telluride detector cooled by liquid nitrogen. Utilizing the two-step wet chemical method, Au thin film (~60 nm) was deposited on the surface of the Si prism for IR reflection enhancement. Before the chemical deposition of Au, the Si prism was polished with Al2O3 and SiO2 suspension, respectively, and cleaned in DI water with ultrasonication. Then the Si prism was immersed in a mixed solution of 98% H2SO4 and 30% H2O2 (volumetric ratio = 7:3) for 30 min. After rinsing off the residual acid solution with DI water, the Si prism was soaked in the quartz crucible containing 40% NH4F aqueous solution and Au plating bath for 3 min, respectively, to prepare Au film on the IR reflection surface. 10 mg catalyst powder was dispersed in the 1 mL mixture solution comprised of 975 μL DI water and isopropanol (volumetric ratio = 1:1), and 25 μL Nafion solution under ultrasonication for 2 h to obtain catalyst ink. 30 μL ink was dropped and dried on the Au-coated prism as the working electrode. The saturated Ag/AgCl electrode (reference electrode) and Pt foil (counter electrode, 1 × 1 cm2) were assembled into a spectroelectrochemical cell with the Au-film prism. The N2-saturated 0.1 M KOH was employed as the electrolyte to slow down the gas bubble production under OER potentials. The electrochemical ATR-SEIRAS was obtained on the multi-potential steps test, which was conducted on CHI 760E electrochemical workstation (Shanghai Chenhua Instrument Co., Ltd), with the open circuit potential and potential windows from 1.20 to 1.50 V vs. RHE. The spectral resolution was 4 cm-1 for all the measurements. The spectra were obtained via the built-in processing program by equation:

Where is absorbance, is reflection under potentials range, and is reflection at open circuit potential.

**In-situ isotope-labelled DEMS measurements**

Isotope-labeled DEMS measurements were performed on a QAS 100 device (Linglu Instruments, Shanghai). The H218O (18O abundance: 98%) was purchased from Beijing InnoChem Science & Technology Co., Ltd. The as-prepared catalysts were used as the work electrodes, with an Hg/HgO and a graphite rod as the reference and counter electrodes, respectively. Firstly, the samples were labelled with 18O-isotopes by the LSV activation for six times in the 0.2 - 0.8 V vs. Hg/HgO potential window in 1 M KOH solution with H218O (scan rate: 5 mV s-1), while recording the DEMS signal. Subsequently, the 18O-isotope labelled samples were carefully rinsed with H216O several times to remove the residual H218O. Finally, LSV tests were performed for the labelled catalysts in 1 M KOH with H216O from 0.2 to 0.8 V vs. Hg/HgO, and the produced oxygen with different molecular weights during OER was detected in real time by mass spectroscopy.

**AEMWE measurements**

Anion exchange membrane (AEM) water electrolyzers with serpentine flow channel were used to test practical applications of Fe-Ni2P/NiMoO4 electrocatalyst. The AEM was purchased from the Anhui Mainz Experimental Equipment Co., Ltd. The as-synthesized Fe-Ni2P/NiMoO4 and MoNi4 on NF were directly used as the anode and cathode, respectively. The AEMWE measurements were operated at 25 °C with a peristaltic pump pumping 1 M KOH at a flow rate of 30 mL·min-1. The electrochemical measurements were conducted on the Corrtest CS310MA electrochemical workstation (Wuhan Corrtest Instruments Corp., Ltd).

**DFT calculations**

In Density Functional Theory (DFT) calculations, structural optimizations were performed under the scheme of generalized gradient approximation (GGA) using the Perdew-Burke-Ernzerhof (PBE) functional1, as embedded in the Vienna *Ab-initio* Simulation Package (VASP)2,3. The projector augmented-wave (PAW) method was employed to treat interactions between ion cores and valence electrons4,5. The plane-wave cutoff energy was fixed to 450 eV. The Van der Waals interactions were considered by grime's DFT-D3 method6,7. The self-consistent calculations applied a convergence energy threshold of 10-5 eV. The equilibrium geometries and lattice constants were optimized with maximum stress on each atom within 0.02 eV Å-1. During the relaxation, the Brillouin zone with a 3 × 2 × 1 Gamma centered grid was used. Spin polarized calculations were performed for this calculation.

For each elementary step, the Gibbs reaction free energy ΔG is defined as the difference between free energies of the initial and final states and is given by the expression:

­

where is the reaction energy of reactant and product molecules adsorbed on catalyst surface, obtained from DFT calculations; and are the change in zero point energies and entropy due to the reaction.

**Supporting Figures**


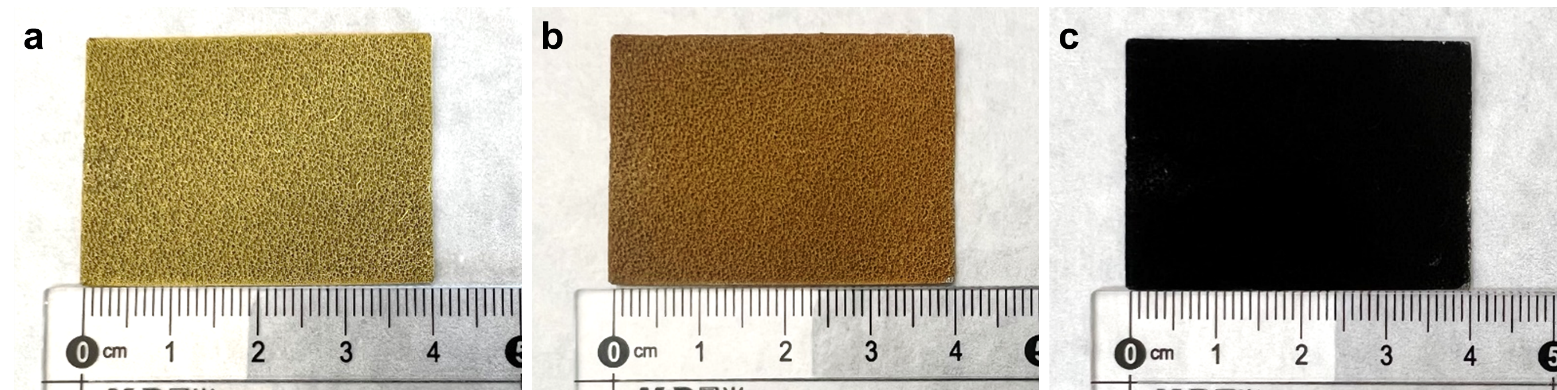


**Supplementary Fig. 1.** Digital photograph of as-prepared catalysts for **a** NiMoO₄·xH₂O, **b** PBA@NiMoO4, and **c** Fe-Ni2P/NiMoO4 on nickel foams.

**Supplementary Fig. 2.** XRD pattern of NiMoO4/NF and PBA@NiMoO4/NF.


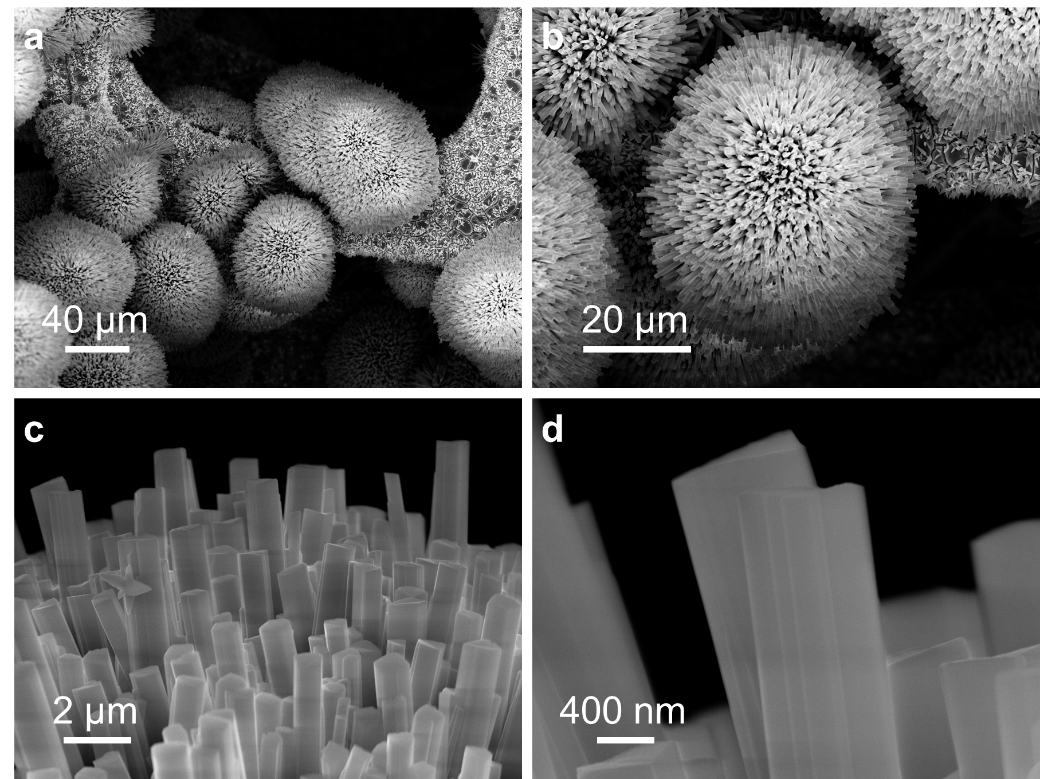


**Supplementary Fig. 3.** **a-d** FESEM images of NiMoO4 at different magnifications.


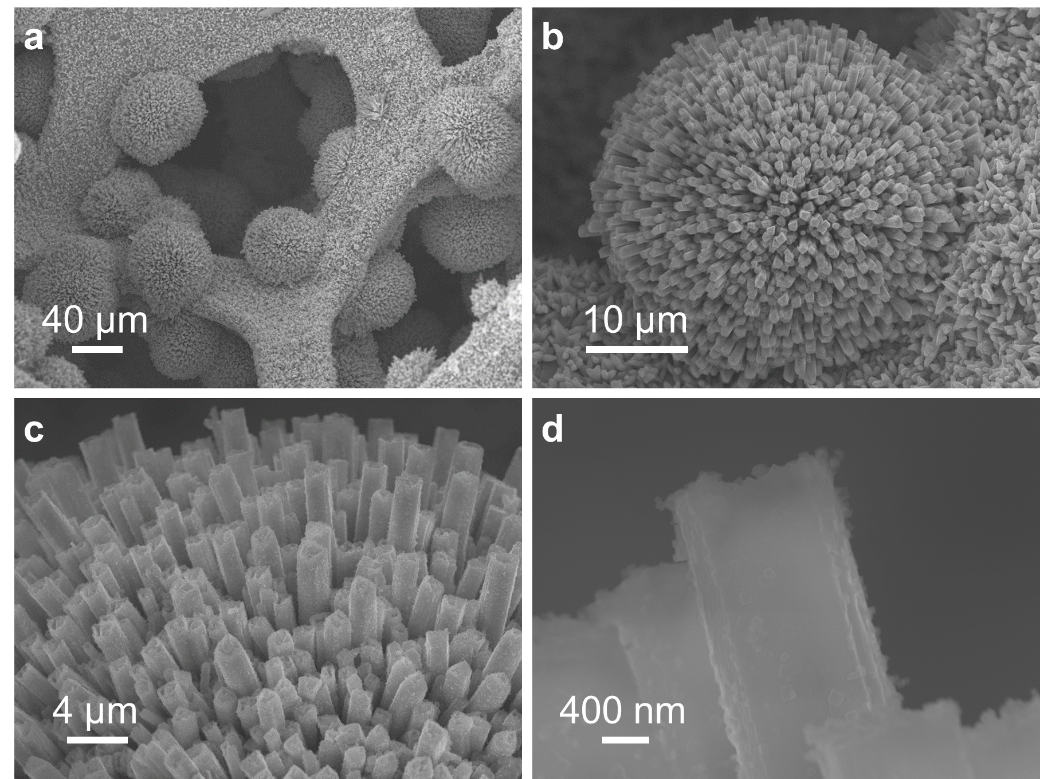


**Supplementary Fig. 4.** **a-d** FESEM images of PBA@NiMoO4 at different magnifications.


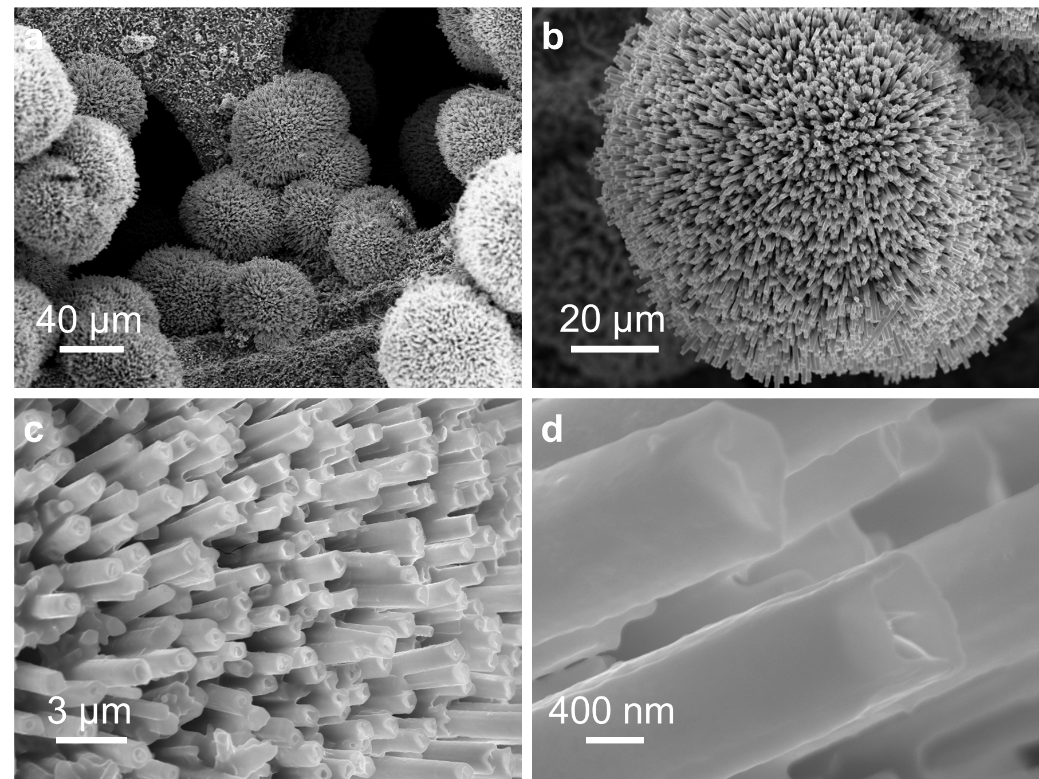


**Supplementary Fig. 5.** **a-d** FESEM images of Fe-Ni2P/NiMoO4 at different magnifications.

**Supplementary Fig. 6.** XRD pattern of 0-PBA@NiMoO4, 1.2-PBA@NiMoO4, and 2.4-PBA@NiMoO4.


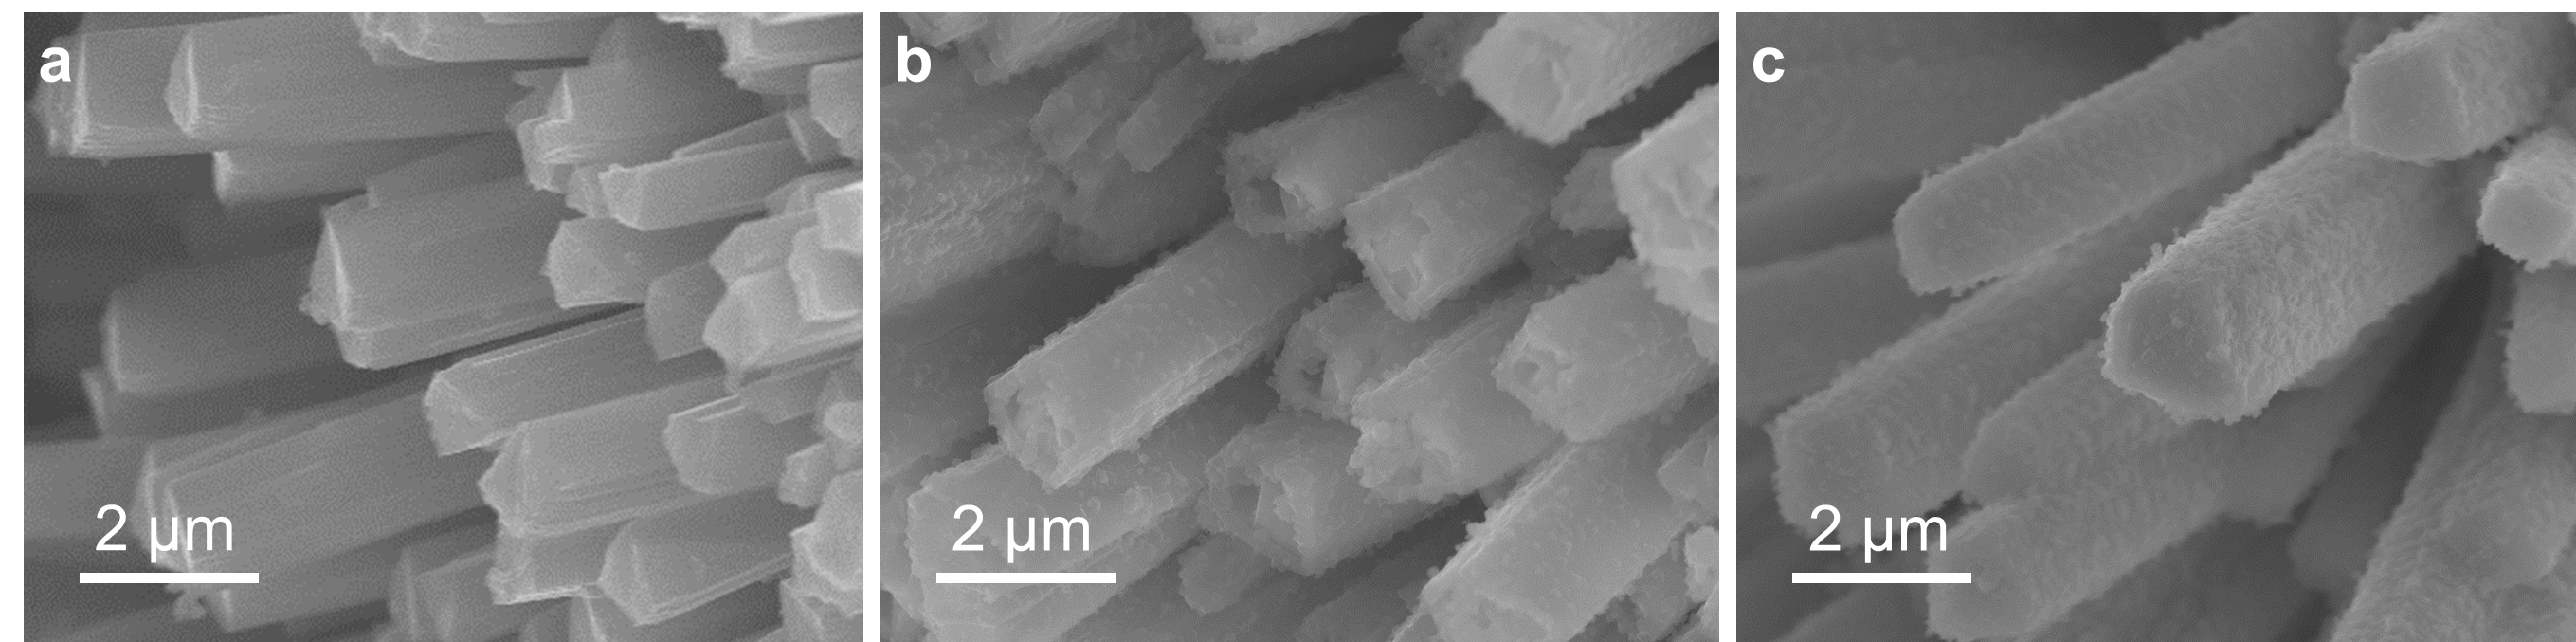


**Supplementary Fig. 7.** FESEM images of **a** 0-PBA@NiMoO4, **b** 1.2-PBA@NiMoO4, and **c** 2.4-PBA@NiMoO4.


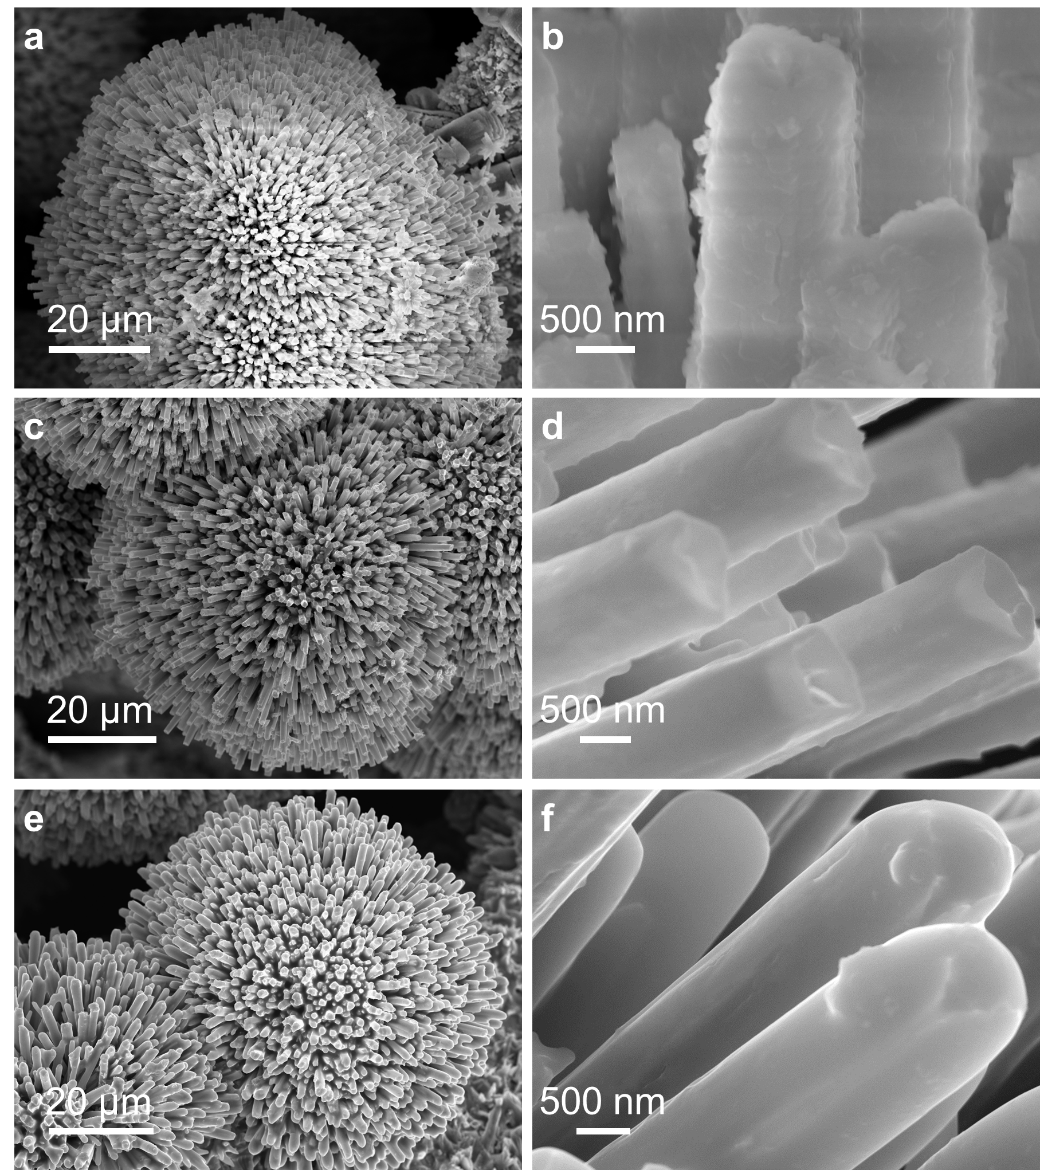


**Supplementary Fig. 8.** FESEM images of Fe-Ni2P/NiMoO4 with different phosphorus source usage for **a, b** 0.9 g, **c, d** 1.8 g, and **e, f** 2.7 g.


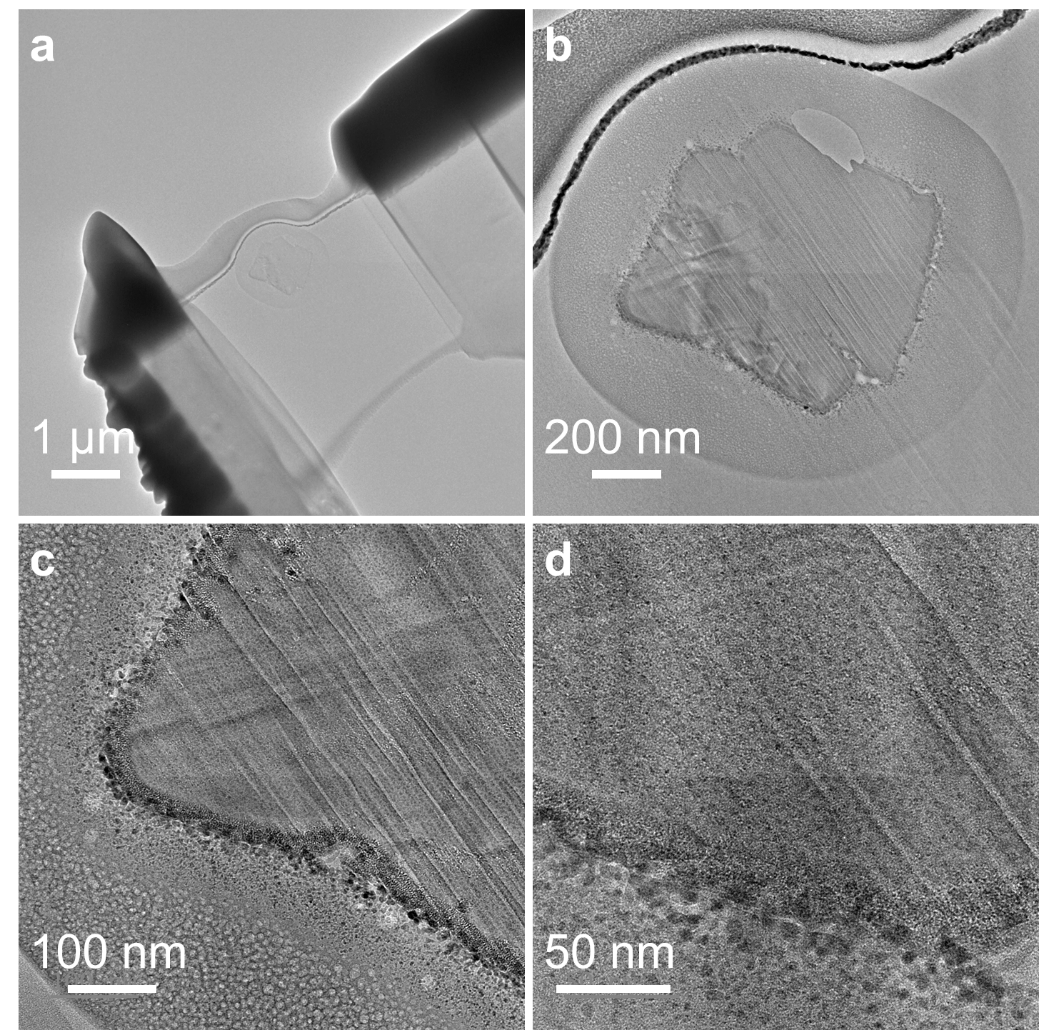


**Supplementary Fig. 9. a-d** The cross-sectional TEM images of Fe-Ni2P/NiMoO4 at different magnifications.


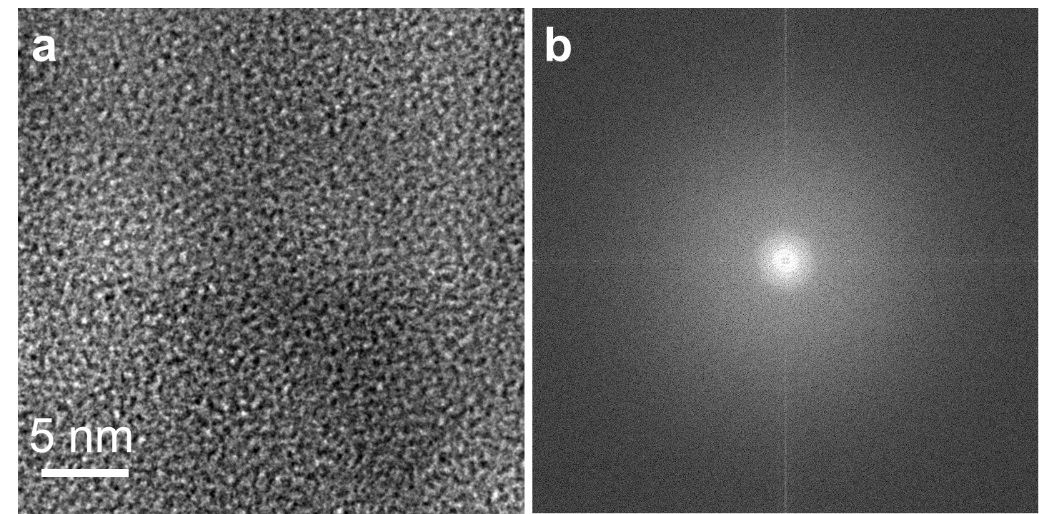


**Supplementary Fig. 10. a** HRTEM image, and **b** corresponding SAED pattern of the amorphous region for Fe-Ni2P/NiMoO4.


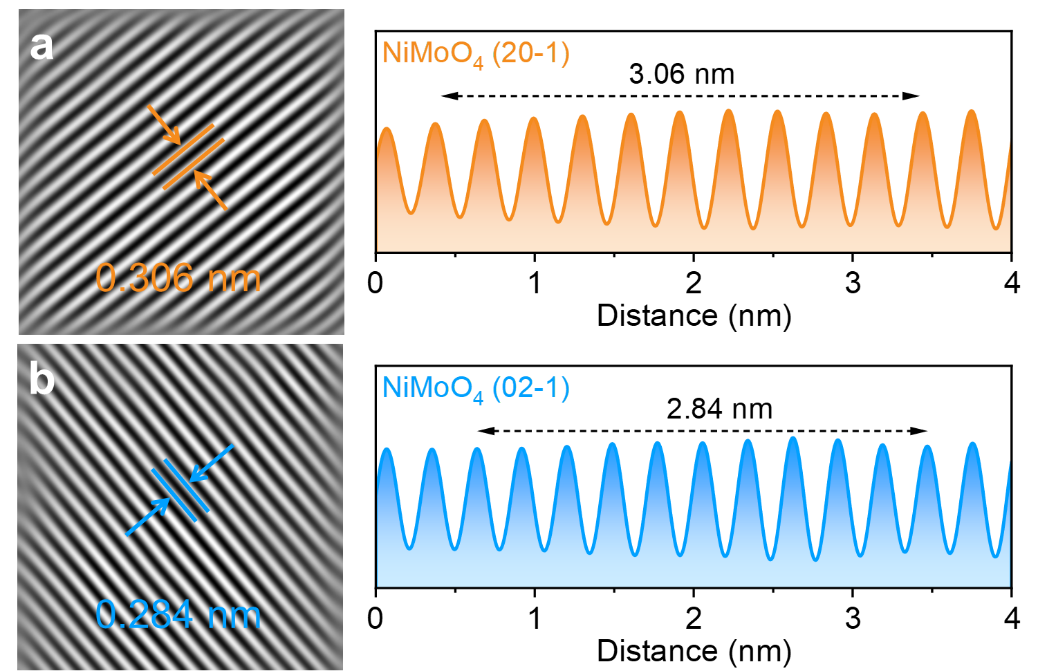


**Supplementary Fig. 11.** The two-dimensional lattice fringes obtained by inverse Fourier Transform and the corresponding intensity-distance images of **a** (20-1) facet, and **b** (02-1) facet.


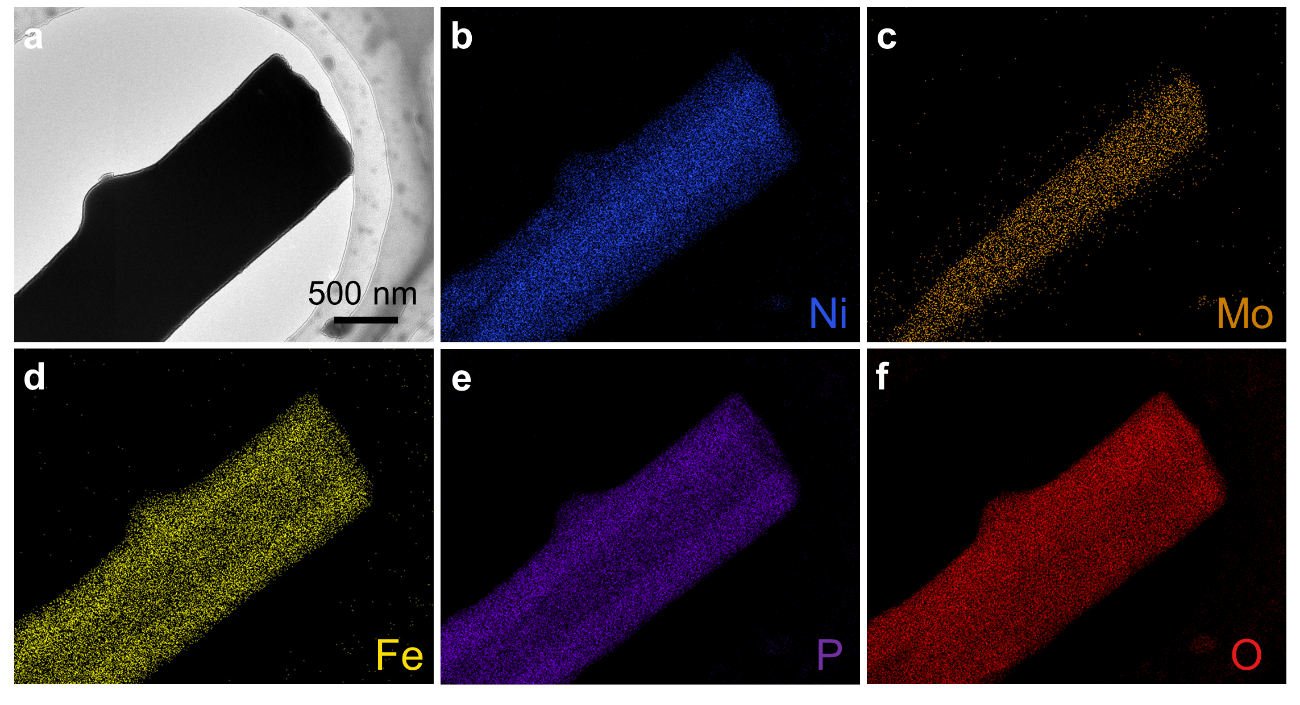


**Supplementary Fig. 12. a** HAADF-STEM image, and **b-f** corresponding EDS element mapping images of Fe-Ni2P/NiMoO4.


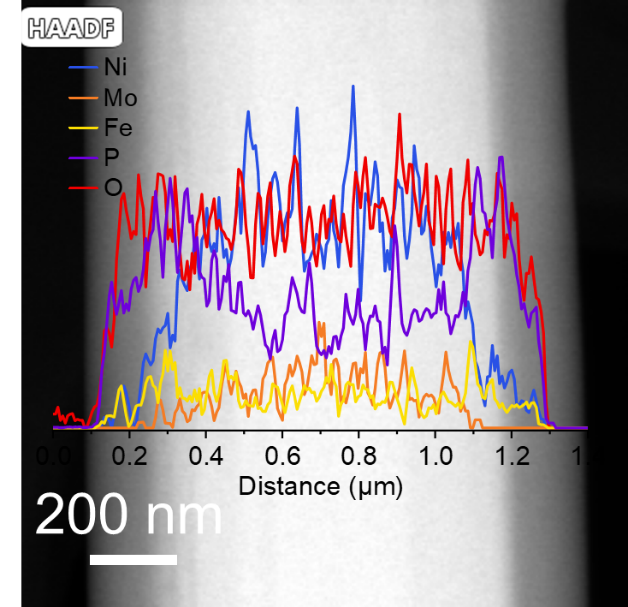


**Supplementary Fig. 13.** Line scan of Fe-Ni2P/NiMoO4.


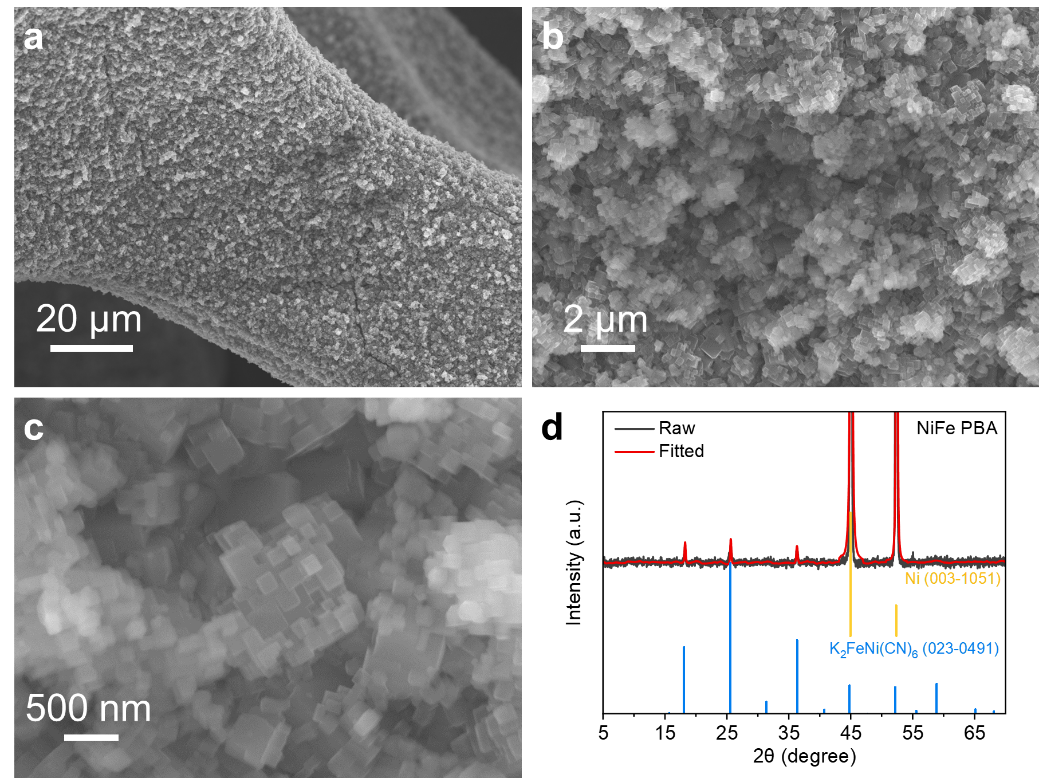


**Supplementary Fig. 14.** **a-c** FESEM images of NiFe PBA/NF at different magnifications. **d** XRD pattern of NiFe-PBA.


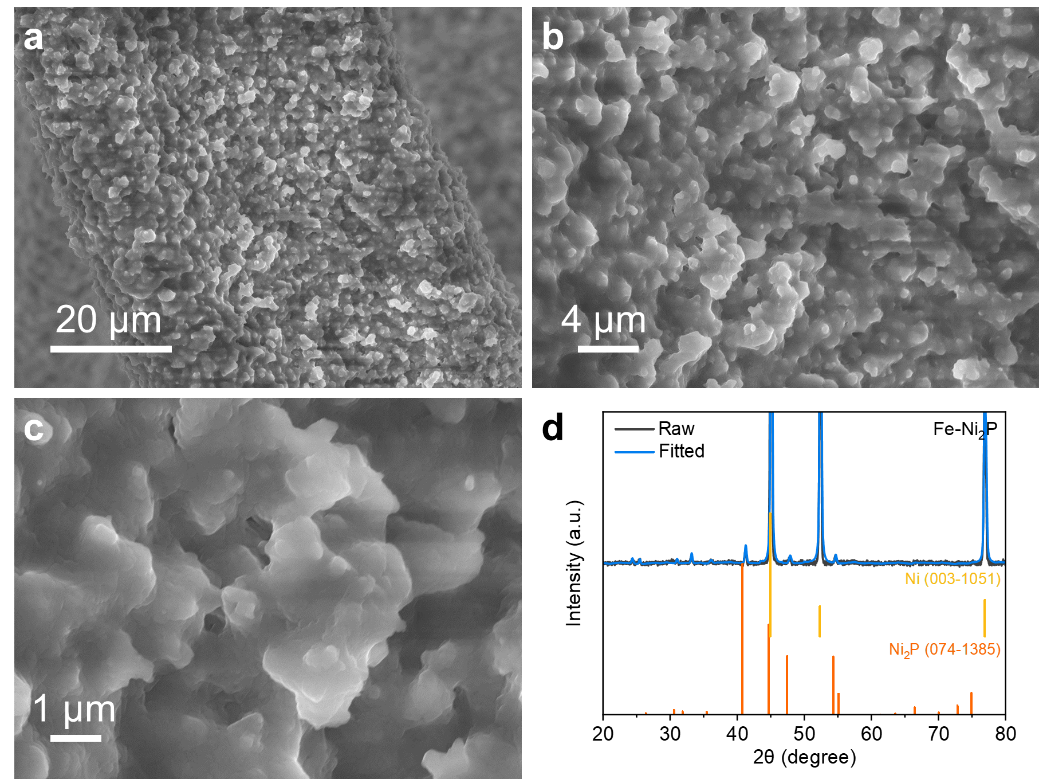


**Supplementary Fig. 15.** **a-c** FESEM images of Fe-Ni2P/NF at different magnifications. **d** XRD pattern of Fe-Ni2P.


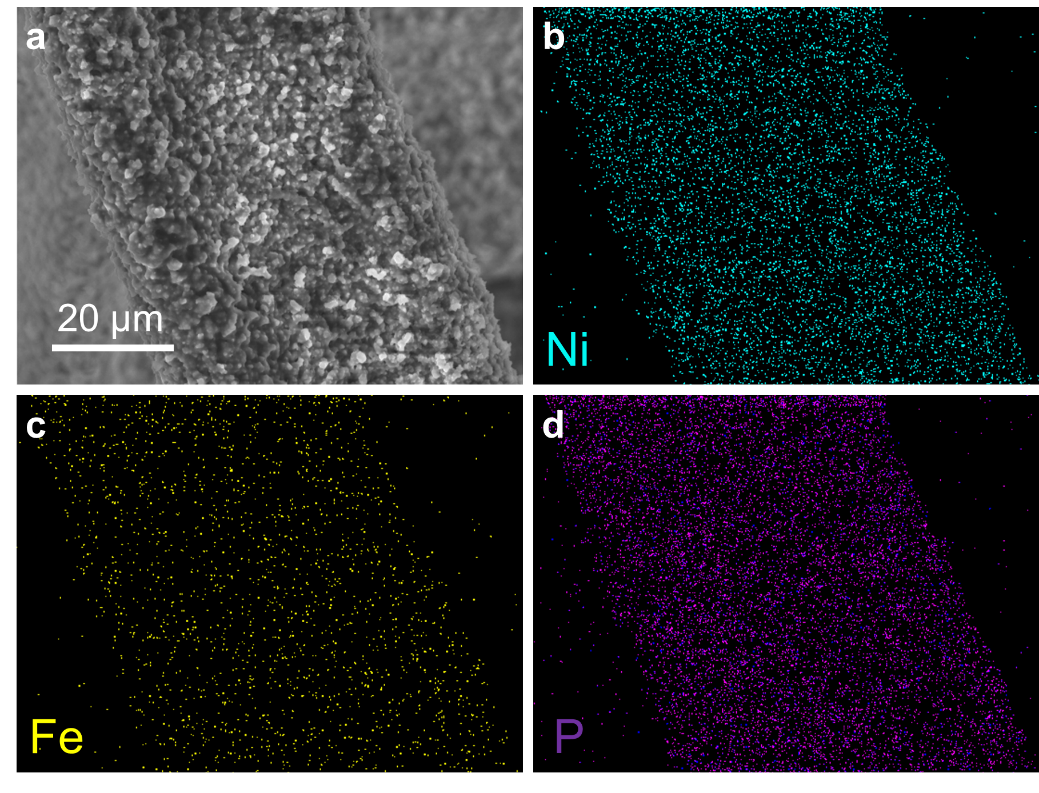


**Supplementary Fig. 16. a** SEM images, and **b-d** corresponding EDS element mapping images of Fe-Ni2P.


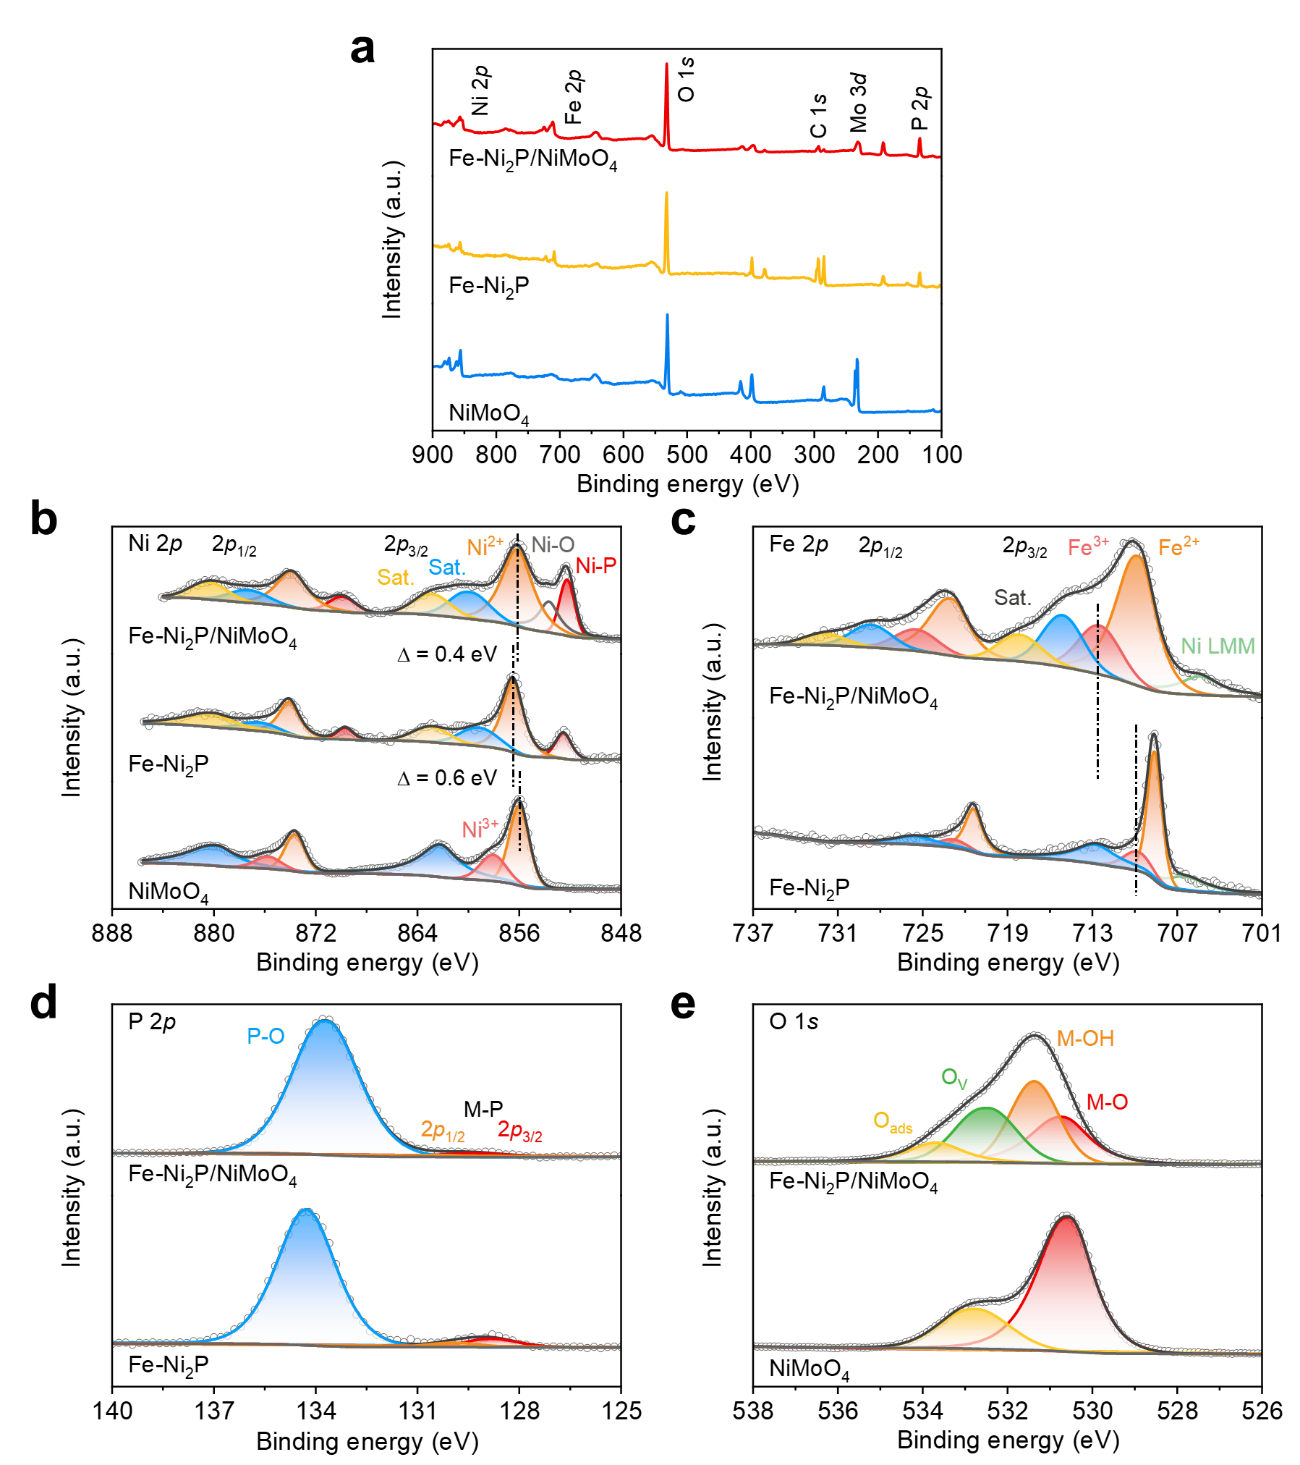


**Supplementary Fig. 17.** The high-resolution XPS spectraof **a** Survey pattern, **b** Ni 2*p*, **c** Fe 2*p*, **d** P 2*p*, and **e** O 1*s* for obtained samples.

As illustrated in Supplementary Fig. 17d, the P 2*p* spectrum of Fe-Ni2P/NiMoO4 and Fe-Ni2P exhibits two peaks at 129.1 and 133.7 eV, which is corresponding to the Ni-P and P-O bonds, respectively, further confirming the formation of nickel phosphides. The high-resolution O 1*s* spectrum (Supplementary Fig. 17e) of Fe-Ni2P/NiMoO4 can be deconvoluted into four peaks located at 530.6, 531.4, 532.5, and 533.7 eV, which can be assigned to lattice oxygen (M-O), M-OH, oxygen vacancy (OV), and adsorbed water (Oads), respectively. In contrast, the O 1*s* spectrum of pristine NiMoO4 displays only two peaks corresponding to M-O and Oads. These observations indicate that the incorporation of Fe-Ni2P into the composite introduces additional oxygen species, such as hydroxyl groups and oxygen vacancies, which may play a significant role in modulating the electronic structure and surface properties of the materials.


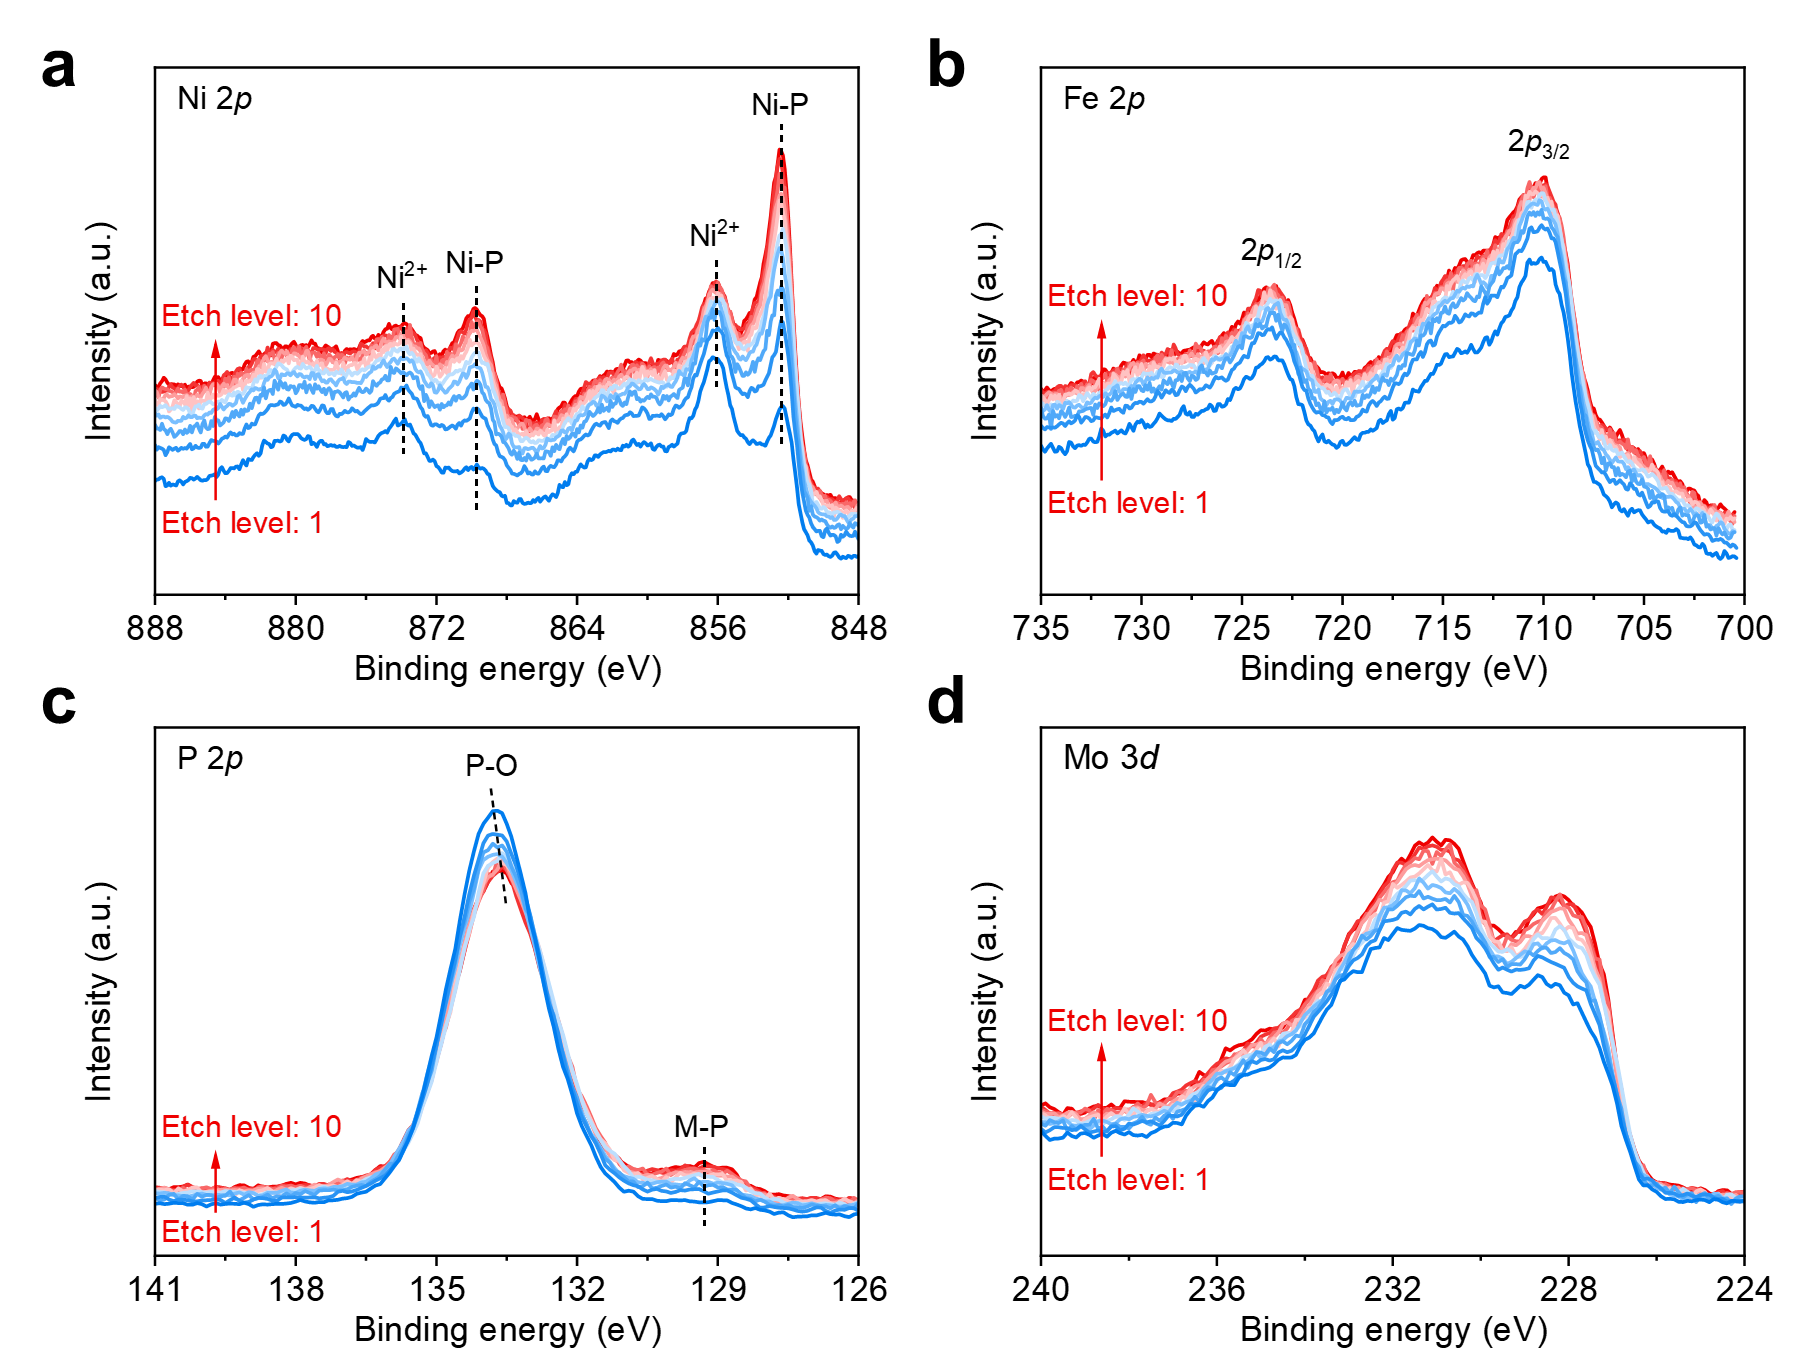


**Supplementary Fig. 18.** The high-resolution XPS depth profileof Fe-Ni2P/NiMoO4 for **a** Ni 2*p*, **b** Fe 2*p*, **c** P 2*p*, and **d** Mo 3*d*.

As shown in Supplementary Fig. 18a, the signal intensity of the Ni-P peaks gradually increases with the augment of etch level (~30 nm for each level). This trend indicates that the Fe-Ni₂P species are predominantly located within the interior of the composite. Especially, the absence of Fe-P peaks in Supplementary Fig. 18b suggests that iron phosphide-related species are not present in the Fe-Ni2P/NiMoO4. Instead, the main presence of Fe dopants is the oxidation state. In the P 2*p* spectrum (Supplementary Fig. 18c), the intensity of the M-P peaks decreases as the increasing of Ni-P peaks, which is in good consistency with Ni 2*p* spectrum.


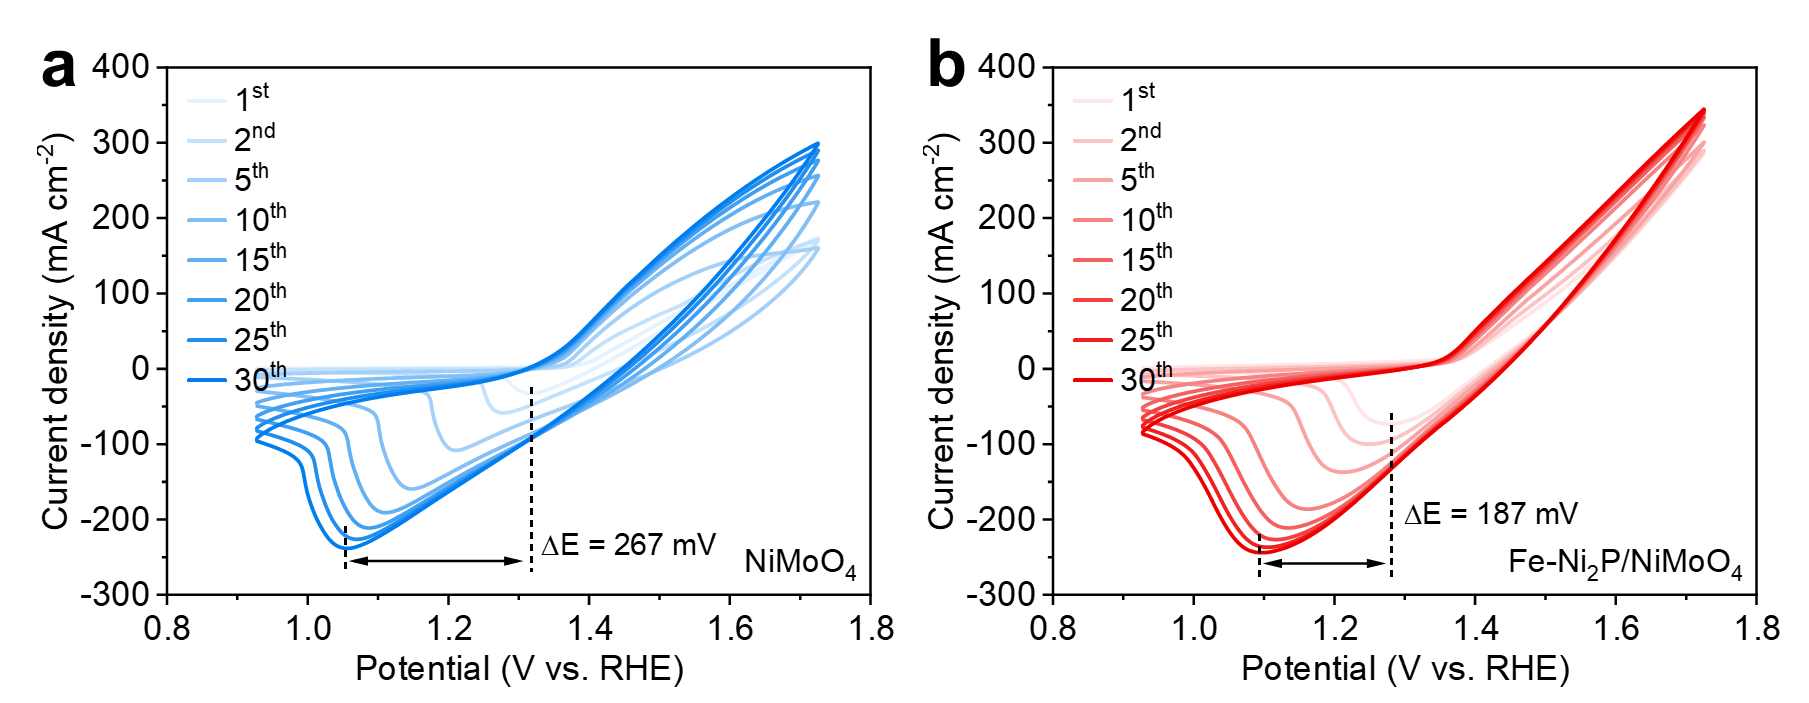


**Supplementary Fig. 19.** The CV curves during electrochemical activation without iR compensation for **a** NiMoO4, and **b** Fe-Ni2P/NiMoO4 from the 1st to 30th cycle at 50 mV s-1.

The CV activation was conducted from 0.0 to 0.8 V vs. Hg/HgO at a scan rate of 50 mV s-1. As shown in the Supplementary Fig. 19, the cathodic peaks of Fe-Ni2P/NiMoO4 exhibit a negative shift of only 187 mV, which is significantly less than that of NiMoO4 (267 mV), demonstrating the optimized redox kinetics of Ni sites in Fe-Ni2P/NiMoO4. Additionally, Fe-Ni2P/NiMoO4 catalyst achieves the maximum current density by the 10th cycle, whereas the CV curves of NiMoO4 do not overlap even after 30th.

**Supplementary Fig. 20.** The chronopotentiometry (CA) curves during electrochemical activation without iR compensation for NiMoO4 and Fe-Ni2P/NiMoO4 at 200 mA cm-2.

The CA curves of pre-catalysts for NiMoO4 and Fe-Ni2P/NiMoO4 at 200 mA cm-2 exhibit a gradually stabilizing potential over time. Notably, only 14 min are required to reach the steady minimum potential for Fe-Ni2P/NiMoO4 catalyst, whereas the pristine NiMoO4 necessitates 170 min for electrochemical activation.


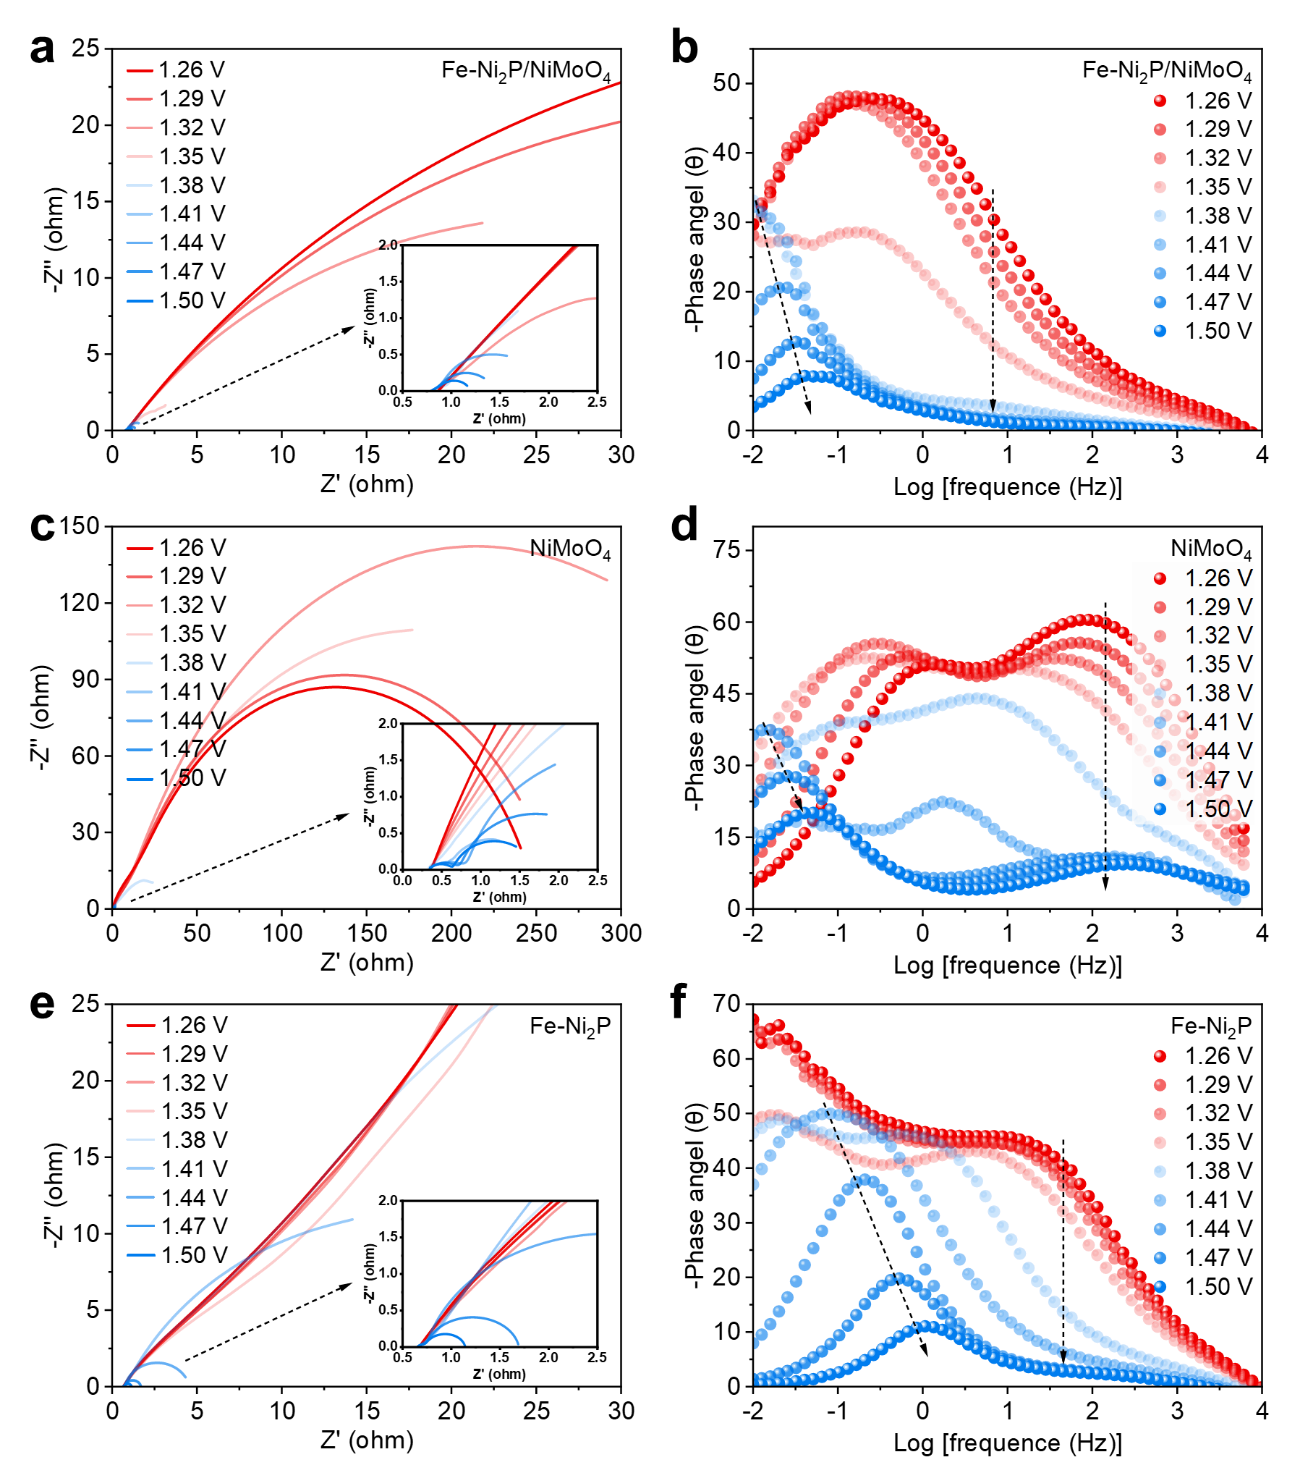


**Supplementary Fig. 21.** The Nyquist curves and bode phase plots at different potentials versus RHE of **a, b** Fe-Ni2P/NiMoO4, **c, d** NiMoO4, and **e, f** Fe-Ni2P.

As displayed in Supplementary Fig. 21a, c, and e, under the high applied potentials ranging from 1.38 to 1.50 V vs. RHE, the Nyquist plots of Fe-Ni2P/NiMoO4, NiMoO4, and Fe-Ni2P all exhibit the distinct semi-circular feature. Notably, the Fe-Ni2P/NiMoO4 composite consistently displays the smallest diameter across each potential, indicating a lower charge transfer resistance for OER. In addition, the phase angle peaks of NiMoO4 and Fe-Ni2P in the Bode plots (Supplementary Fig. 21b, d, and f) appear at 1.41 V vs. RHE, which is higher than that of Fe-Ni2P/NiMoO4 (1.38 V). Meanwhile, Fe-Ni2P/NiMoO4 consistently exhibits the smallest phase angle peak at low-frequency region from 1.38 to 1.50 V, indicating the superior OER performance. This observation is consistent with the results of the Nyquist plots.

**Supplementary Fig. 22.** The in-situ Raman spectroscopy analysis of catalyst reconstruction for NiMoO4.

**Supplementary Fig. 23.** XRD pattern analysis of activated catalysts for R-Fe-Ni2P/NiMoO4 and R-NiMoO4.

**Supplementary Fig. 24.** The ex-situ Raman spectroscopy analysis of activated catalysts for R-Fe-Ni2P/NiMoO4 and R-NiMoO4.


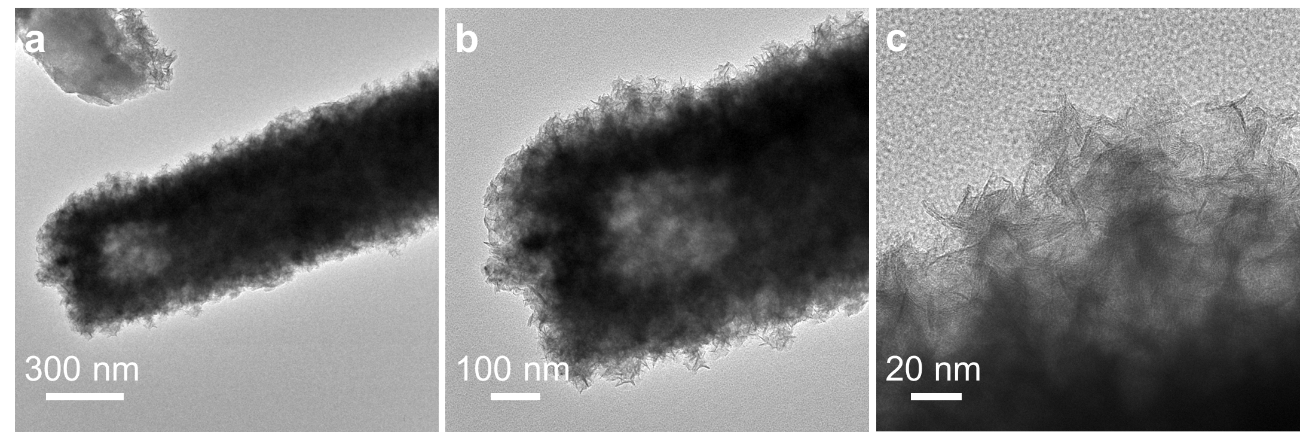


**Supplementary Fig. 25. a-c** The TEM images of activated catalyst for R-Fe-Ni2P/NiMoO4 at different magnifications.


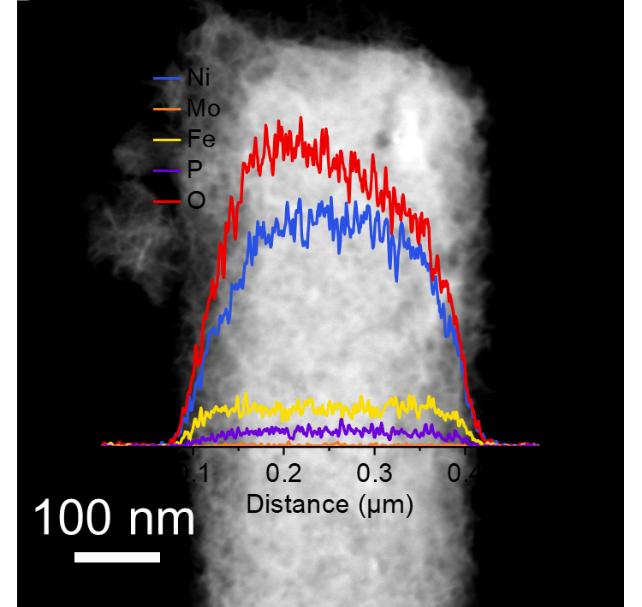


**Supplementary Fig. 26.** Line scan of the activated catalyst for R-Fe-Ni2P/NiMoO4.


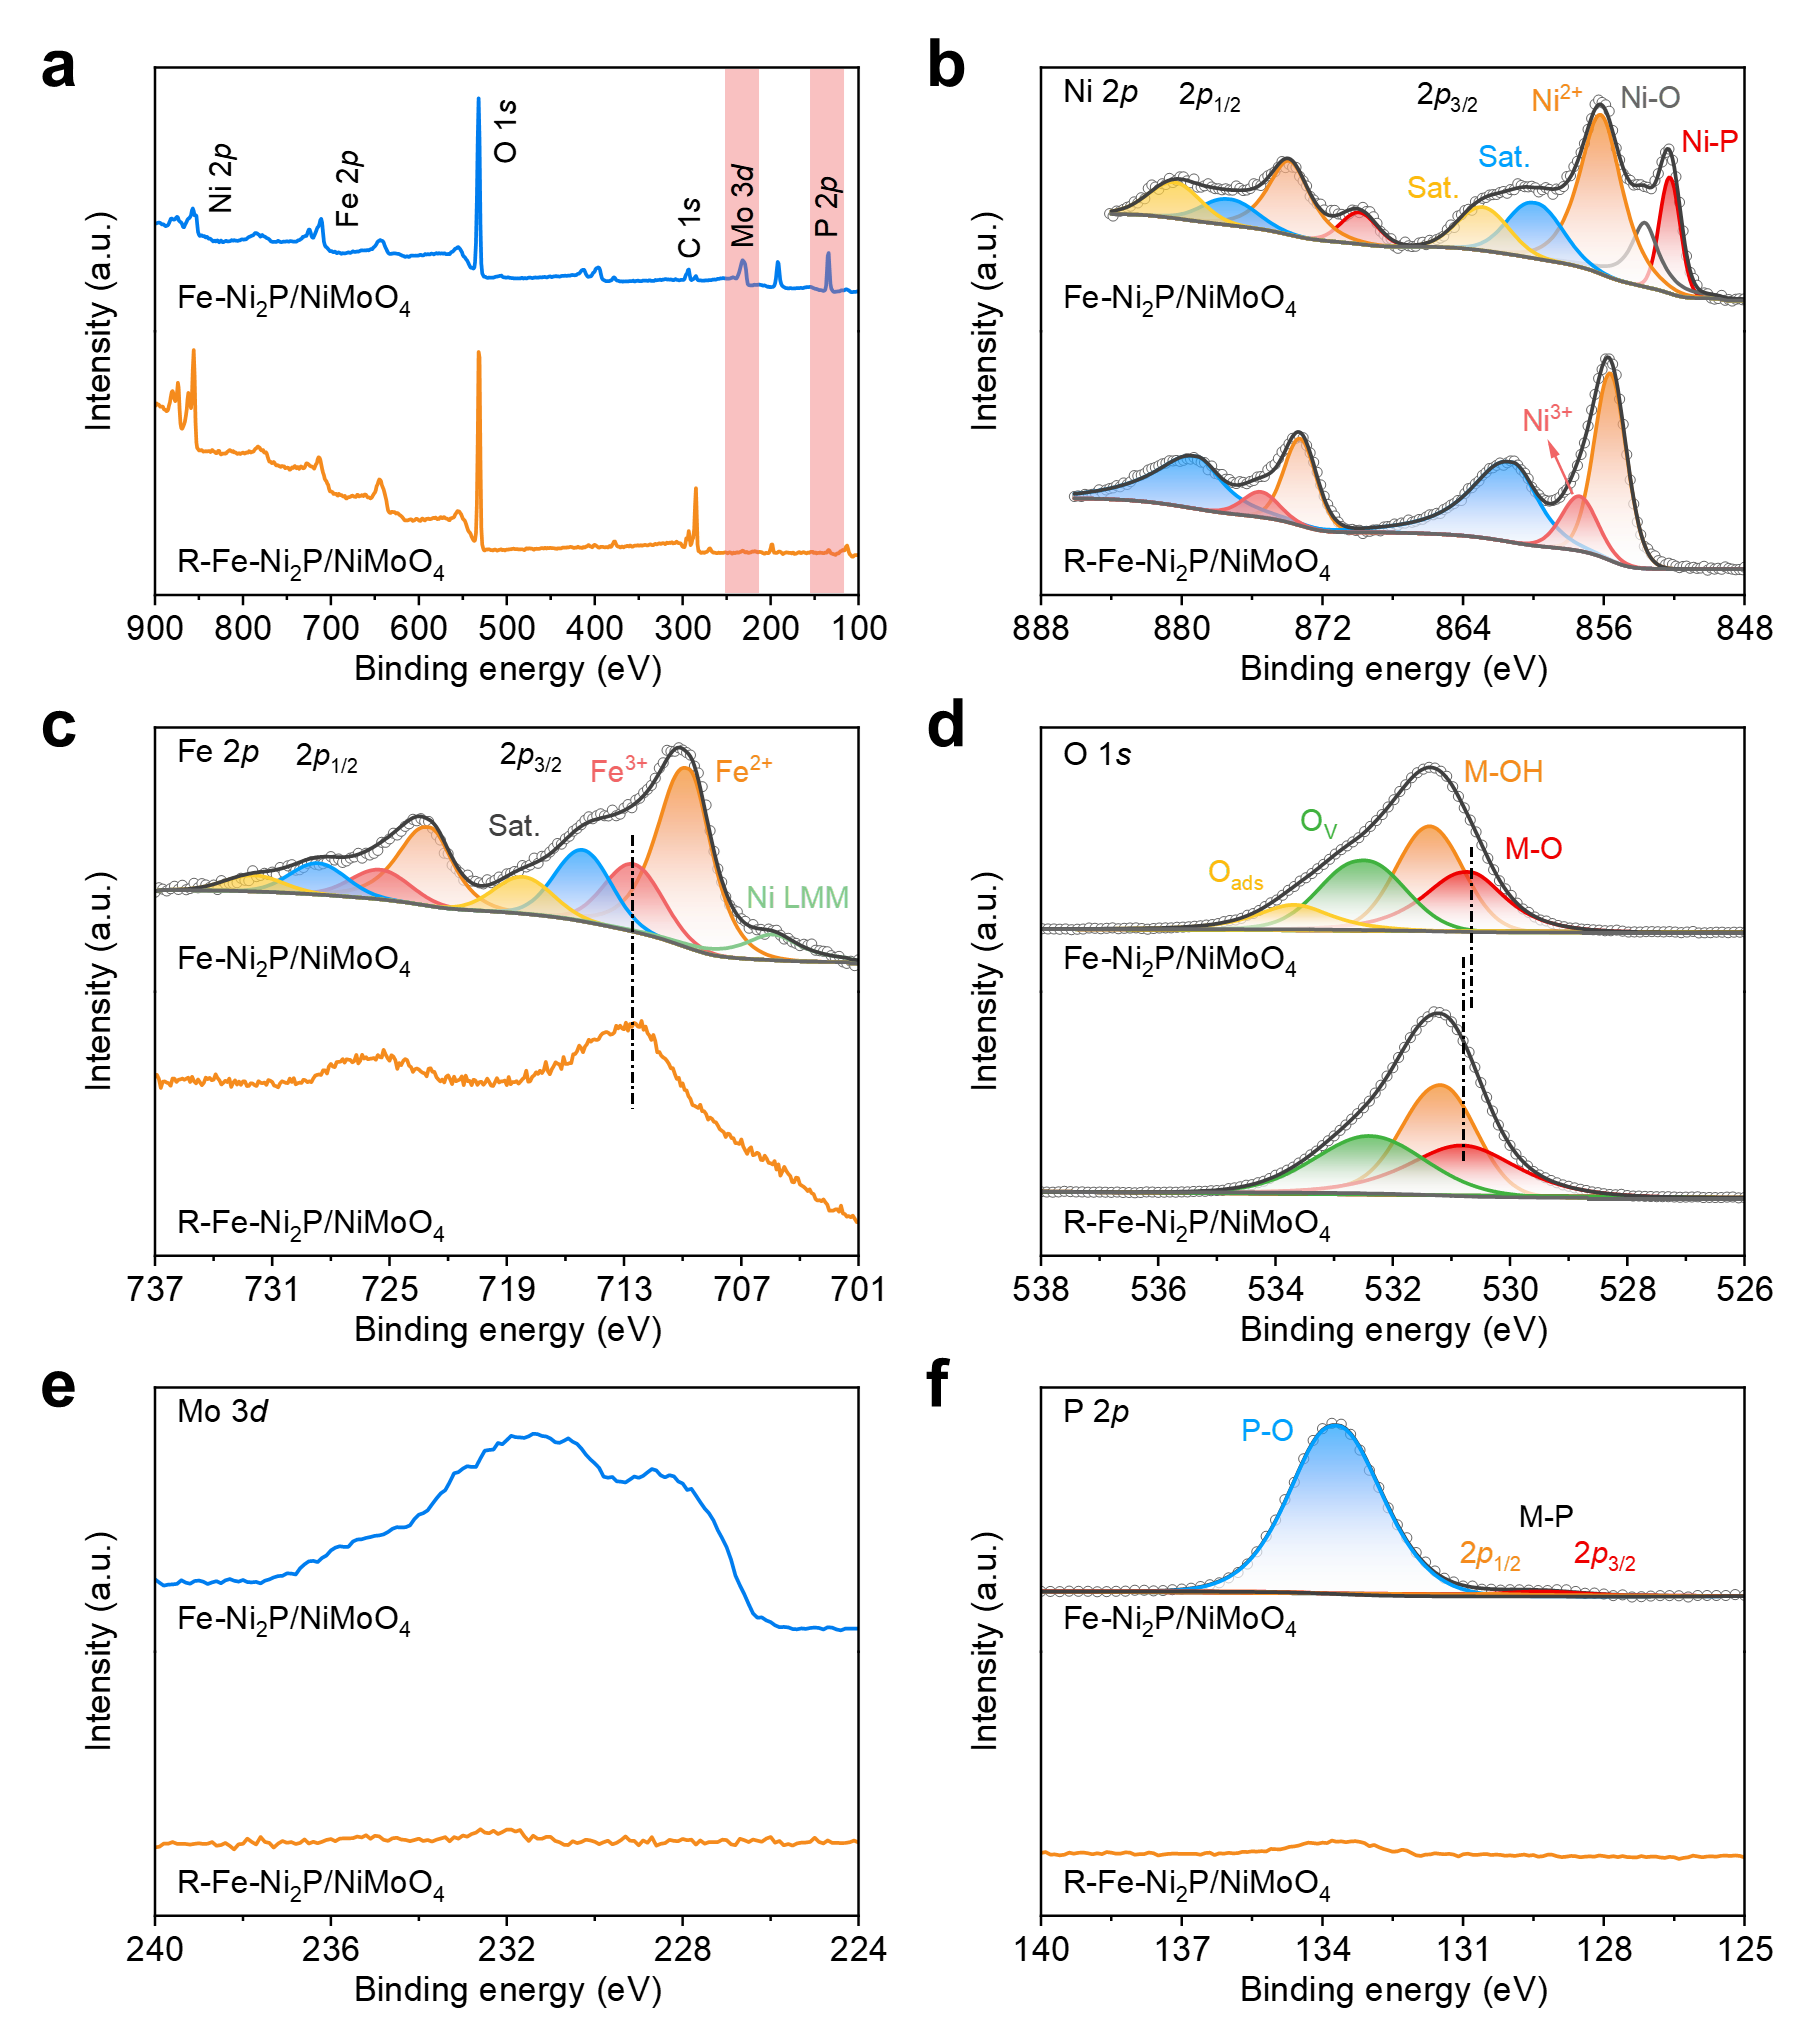


**Supplementary Fig. 27.** XPS spectra of Fe-Ni2P/NiMoO4 before and after reconfiguration for **a** survey pattern, **b** Ni 2*p*, **c** Fe 2*p*, **d** O 1*s*, **e** Mo 3*d*, and **f** P 2*p*.


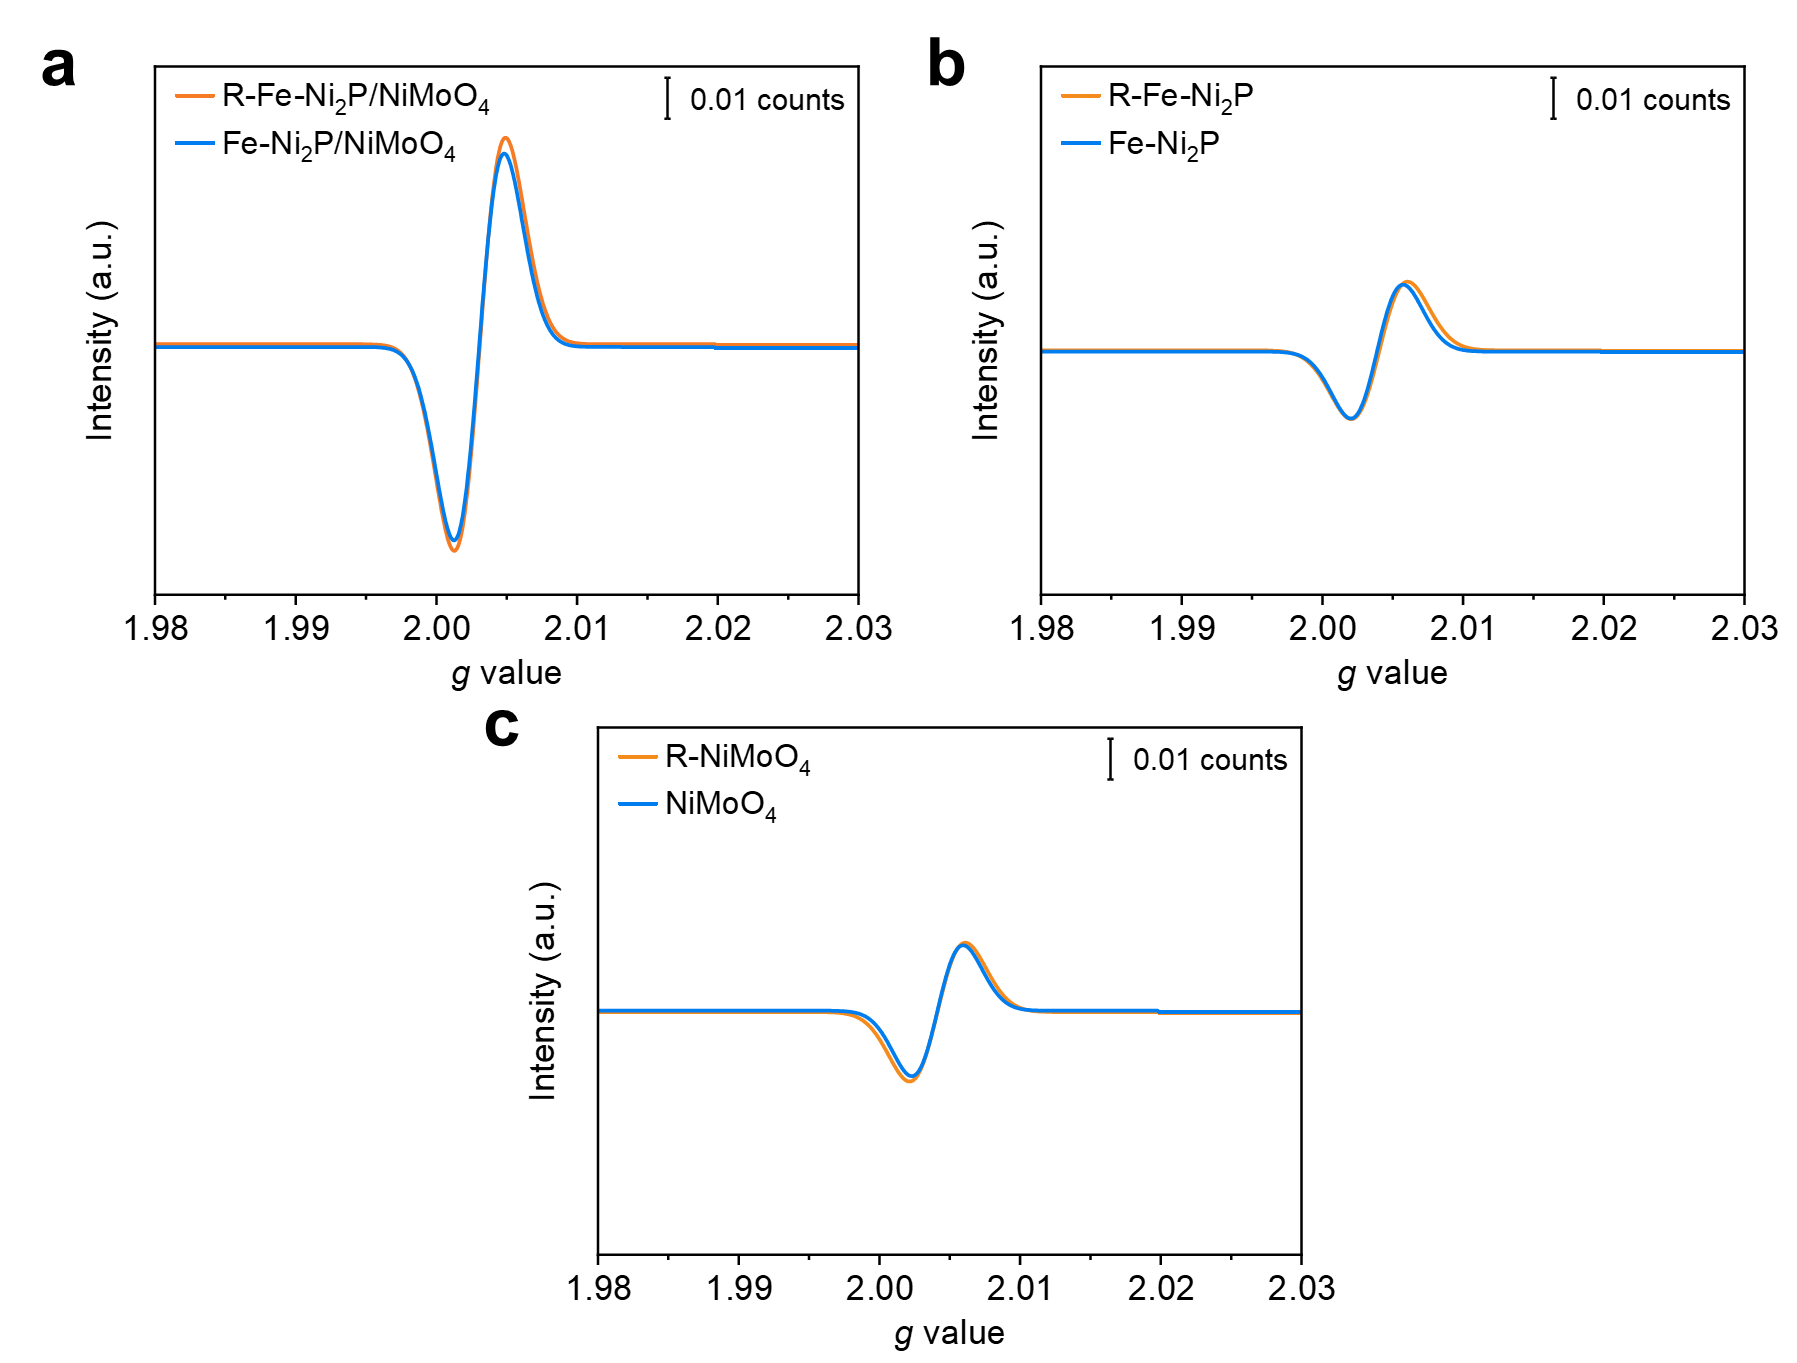


**Supplementary Fig. 28.** Electron paramagnetic resonance (EPR) spectra before and after reconfiguration for **a** Fe-Ni2P/NiMoO4, **b** Fe-Ni2P, and **c** NiMoO4.


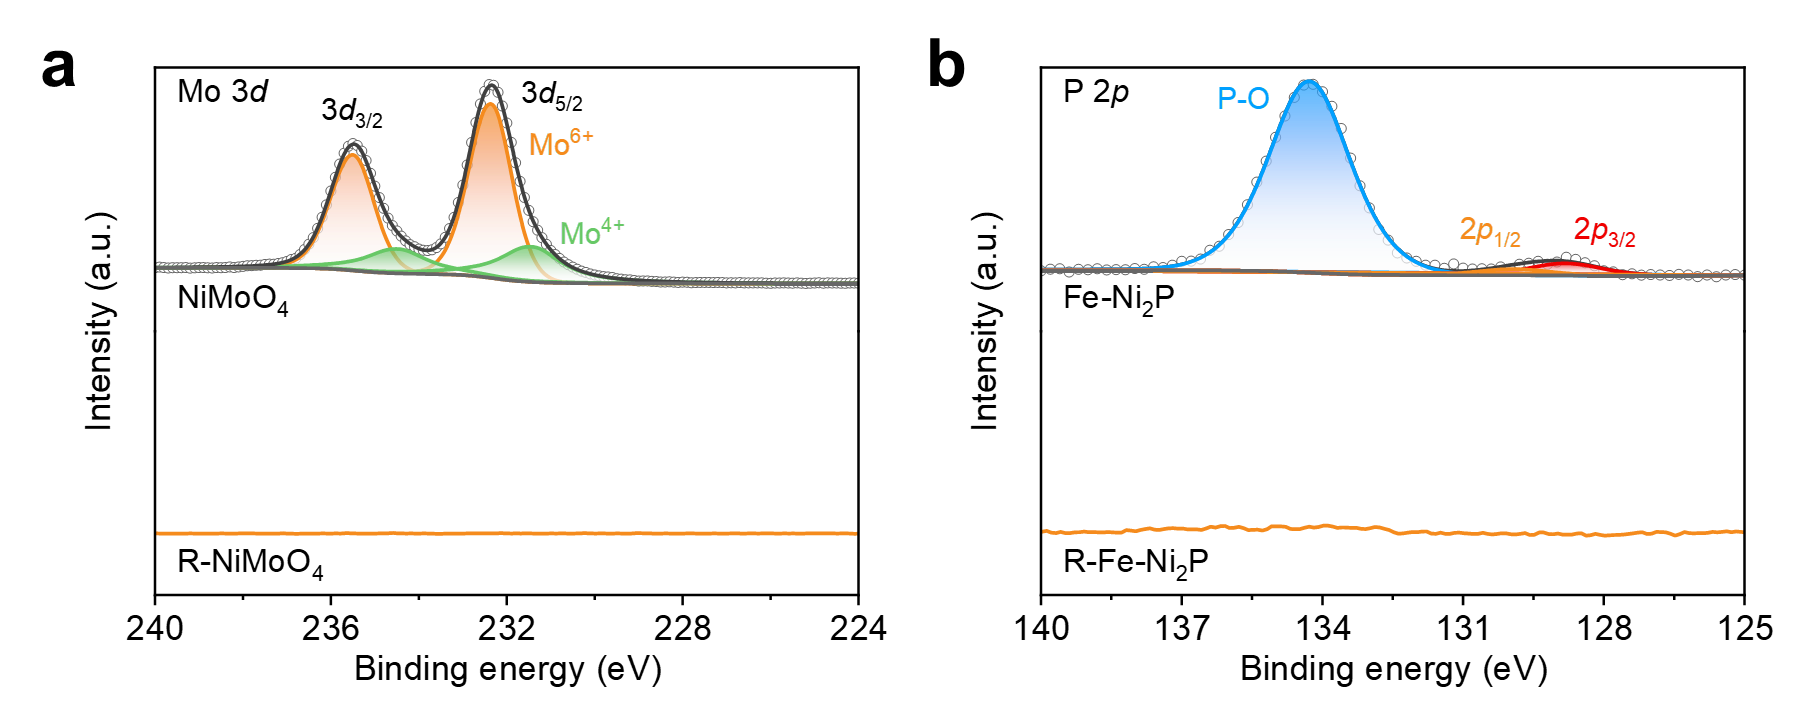


**Supplementary Fig. 29.** XPS spectra before and after reconfiguration for **a** Mo 3*d* of NiMoO4, and **b** P 2*p* of Fe-Ni2P.

**Supplementary Fig. 30.** The Tafel slopes of as-prepared samples.

**Supplementary Fig. 31.** The EIS curves of as-prepared samples.


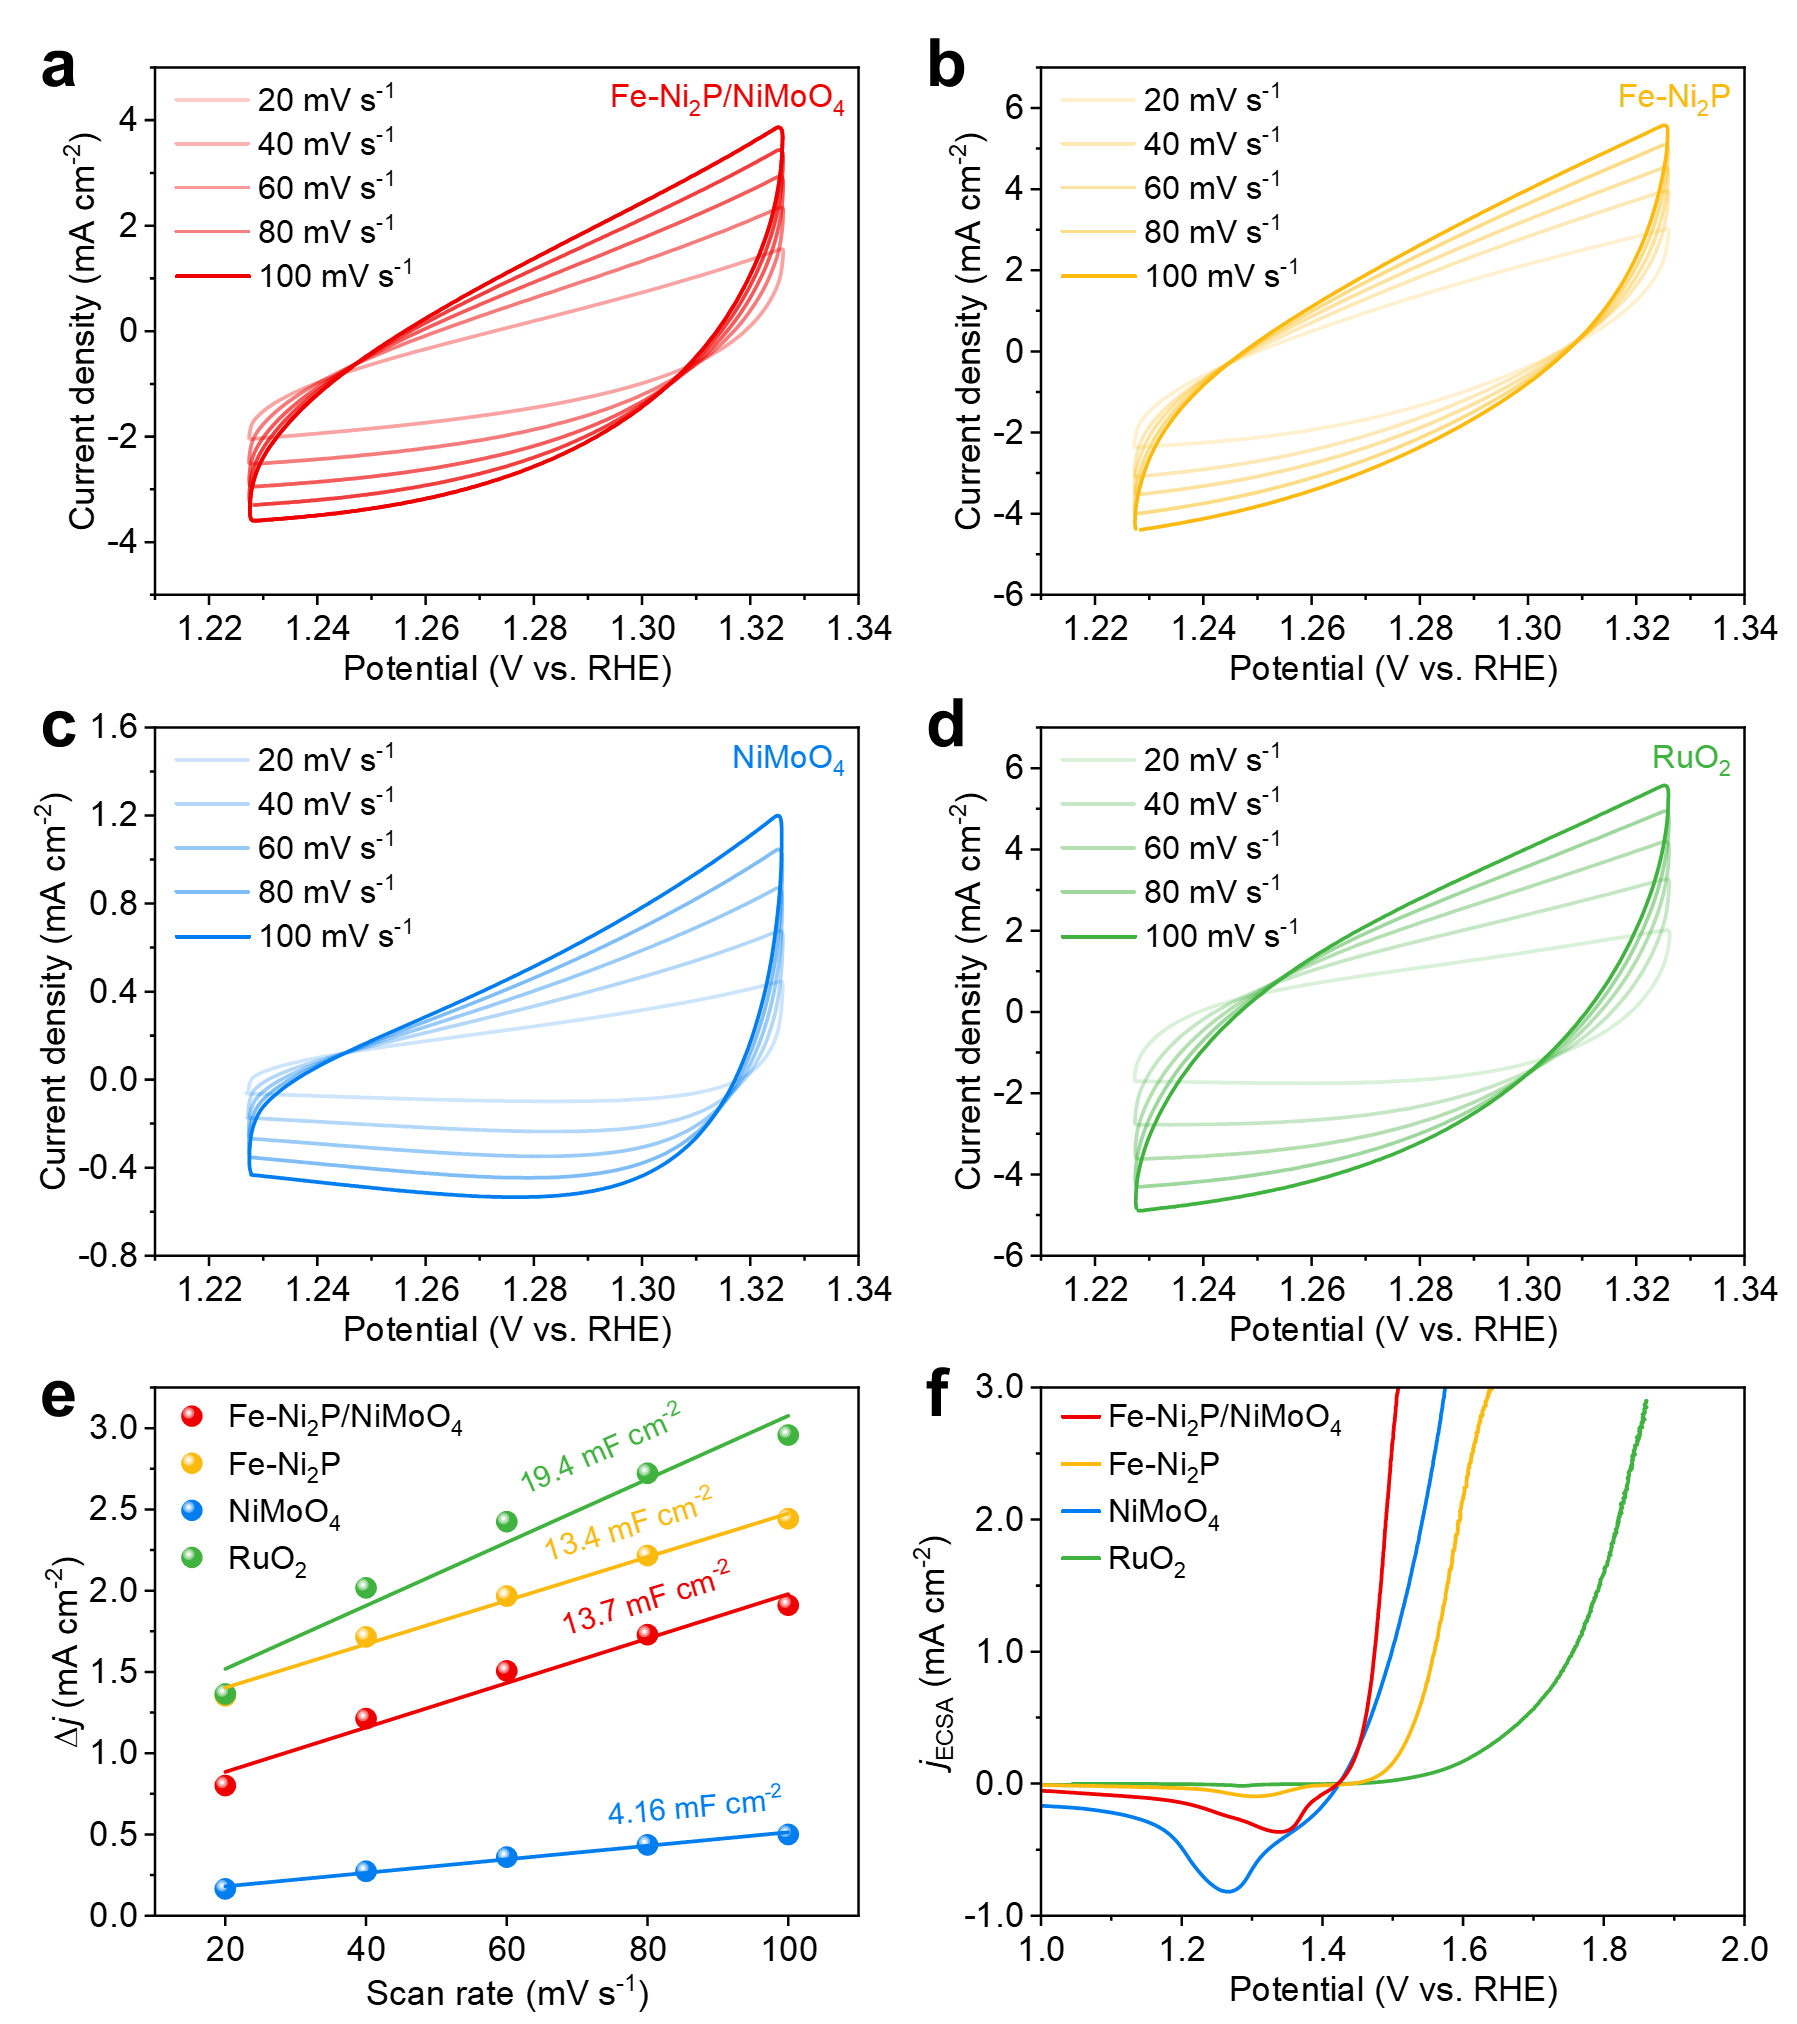


**Supplementary Fig. 32. a-d** CV curves in the region of 1.23 - 1.33 V vs. RHE at scan rates ranging from 20 to 100 mV s-1. **e** Calculated Cdl values, and **f** LSV curves normalized by ECSA of as-prepared samples.


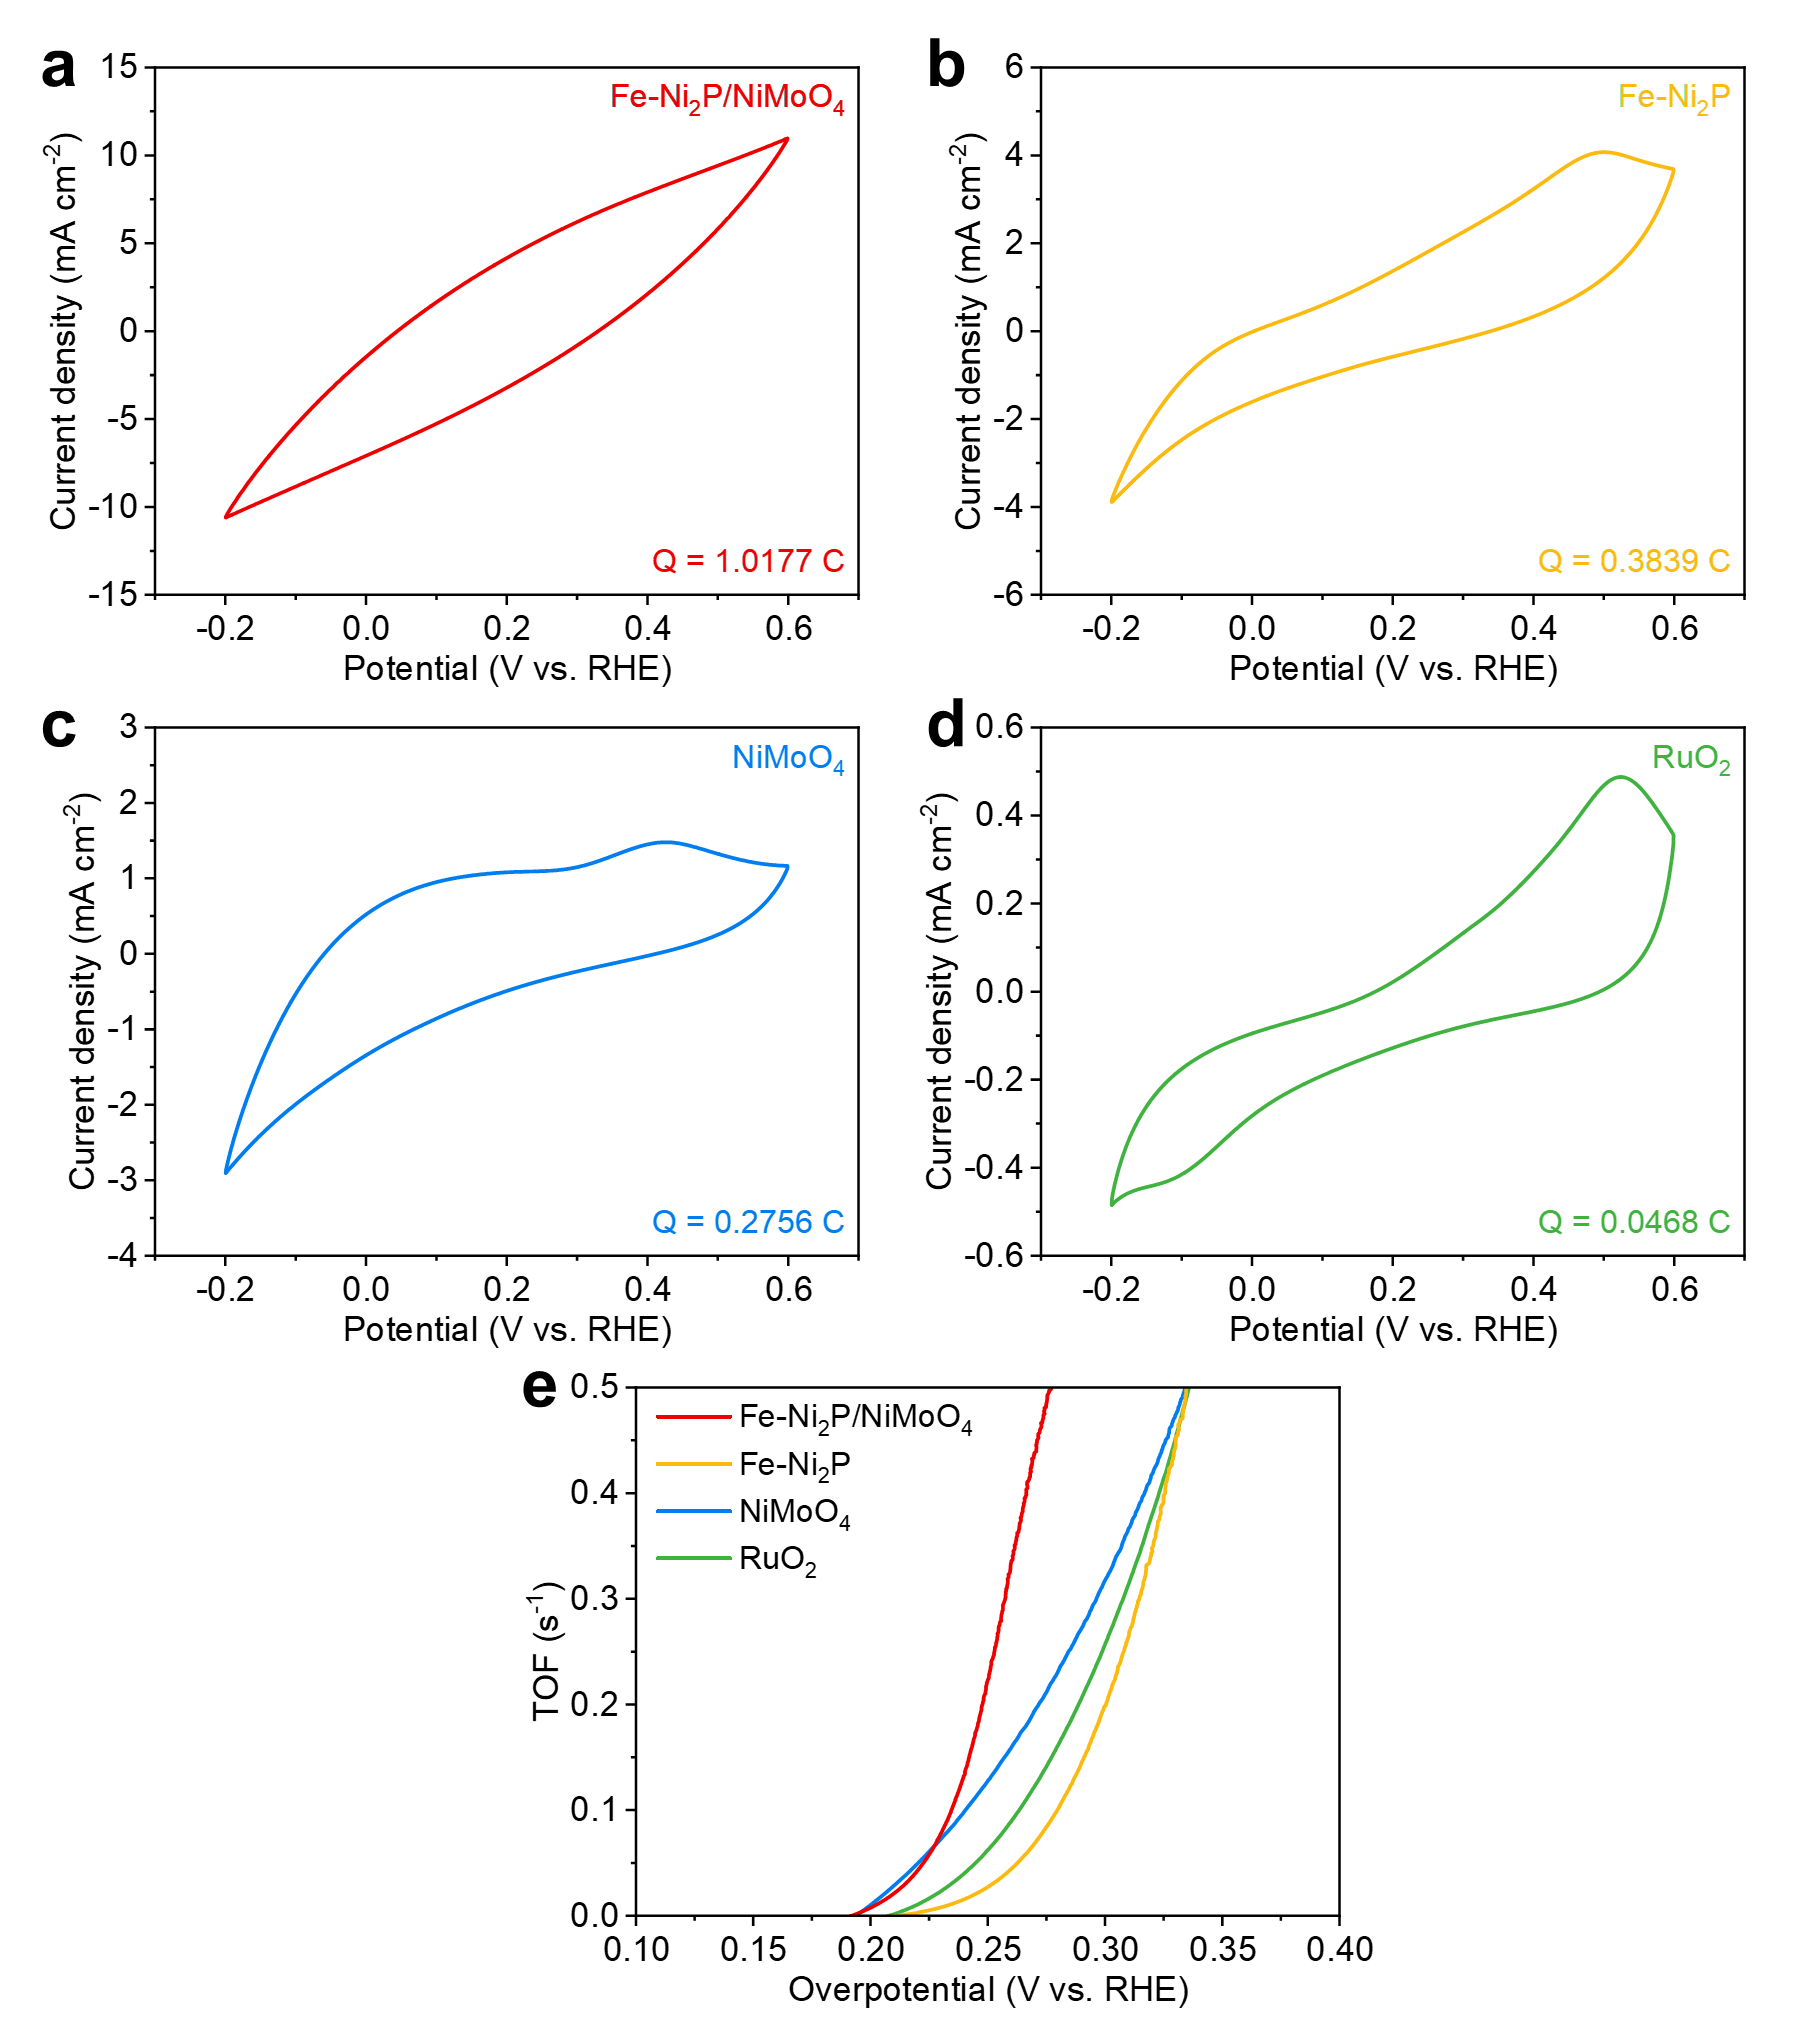


**Supplementary Fig. 33. a-d** CV curves from -0.2 to 0.6 V vs. RHE at the scan rate of 50 mV s-1 in 1 M PBS solution and calculated Q values. **e** Calculated O2 TOF values of as-prepared samples.

The number of voltametric charges is obtained from CV curves measured from -0.2 to 0.6 V vs. RHE at the scan rate of 50 mV s-1 in 1 M phosphate buffer solution (PBS). The TOF values are calculated according to the following equation:

Where is the number of voltametric charges, is Faraday constant (96485 C mol-1), is current (A) during the LSV test, is the number of active sites (mol), and the factor 4 corresponding to the four-electron process for O2 formation.


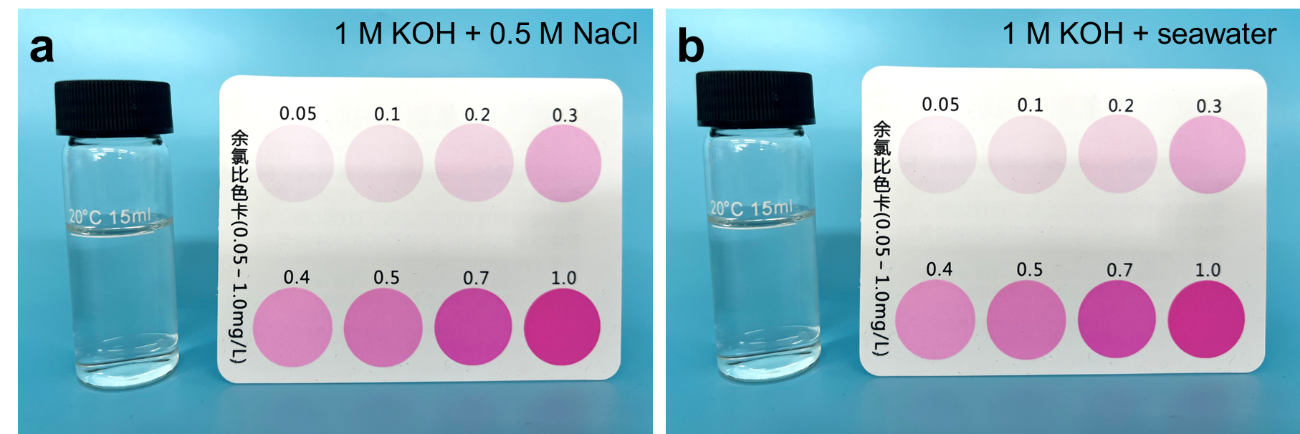


**Supplementary Fig. 34.** Detection results for ClO- generation in **a** 1 M KOH + 0.5 M NaCl, and **b** 1M KOH + seawater electrolytes after stability test under a current density of 1.0 A cm-2.


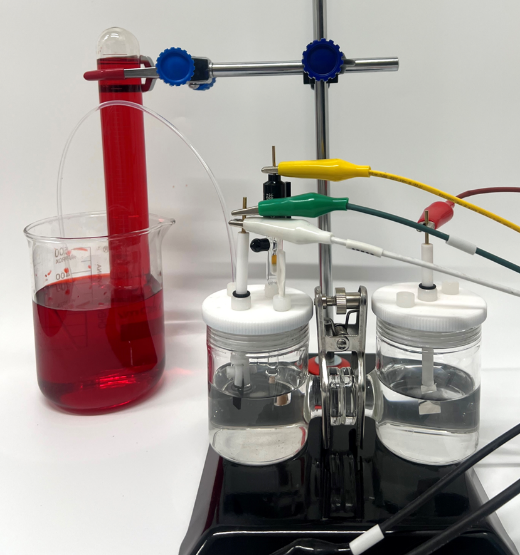


**Supplementary Fig. 35.** Digital photograph of home-made Faraday efficiency testing device.


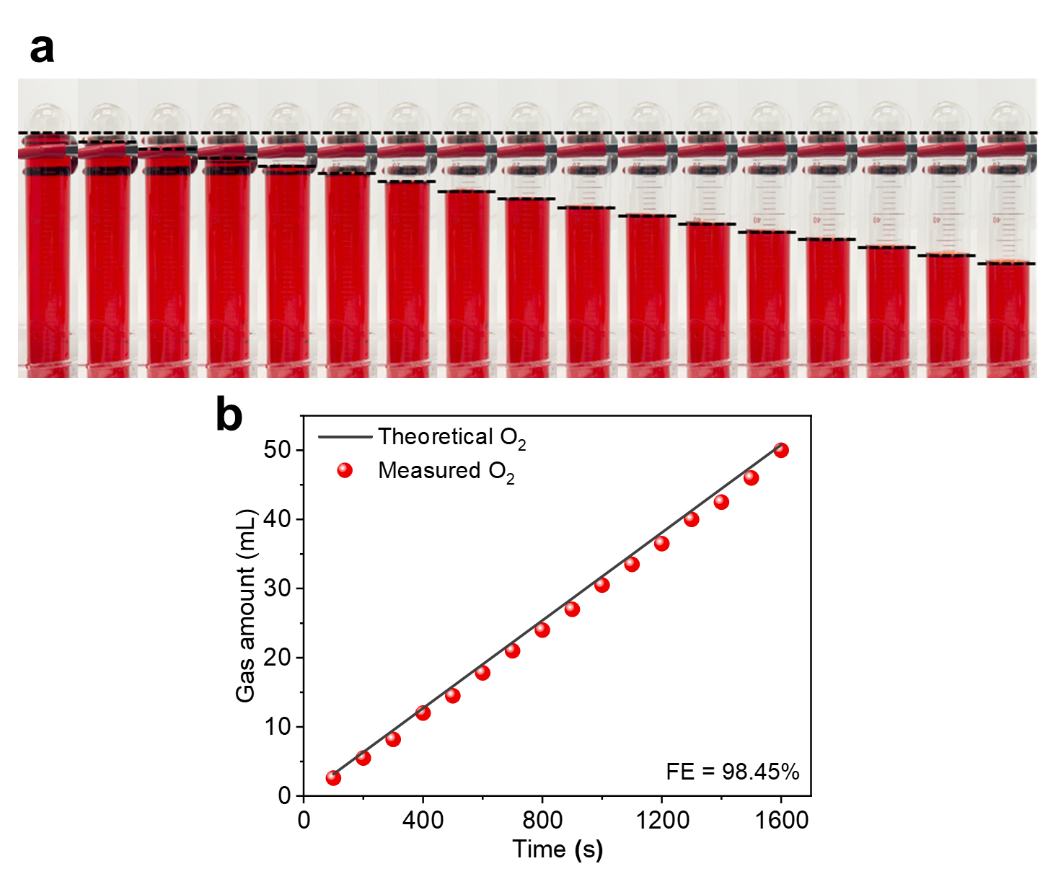


**Supplementary Fig. 36.** **a** Digital photograph of O2 collection, and **b** Theoretical and measured volume of O2 for Fe-Ni2P/NiMoO4 in 1 M KOH.


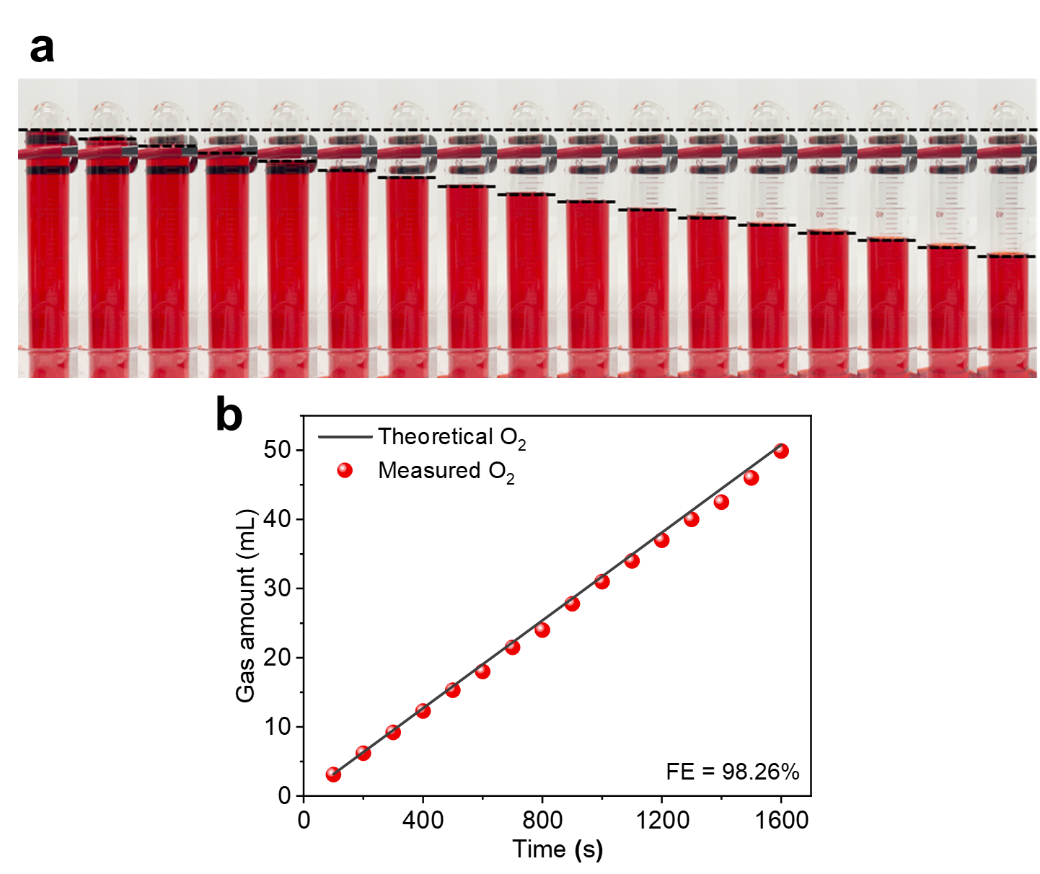


**Supplementary Fig. 37.** **a** Digital photograph of O2 collection, and **b** Theoretical and measured volume of O2 for Fe-Ni2P/NiMoO4 in 1 M KOH + seawater.


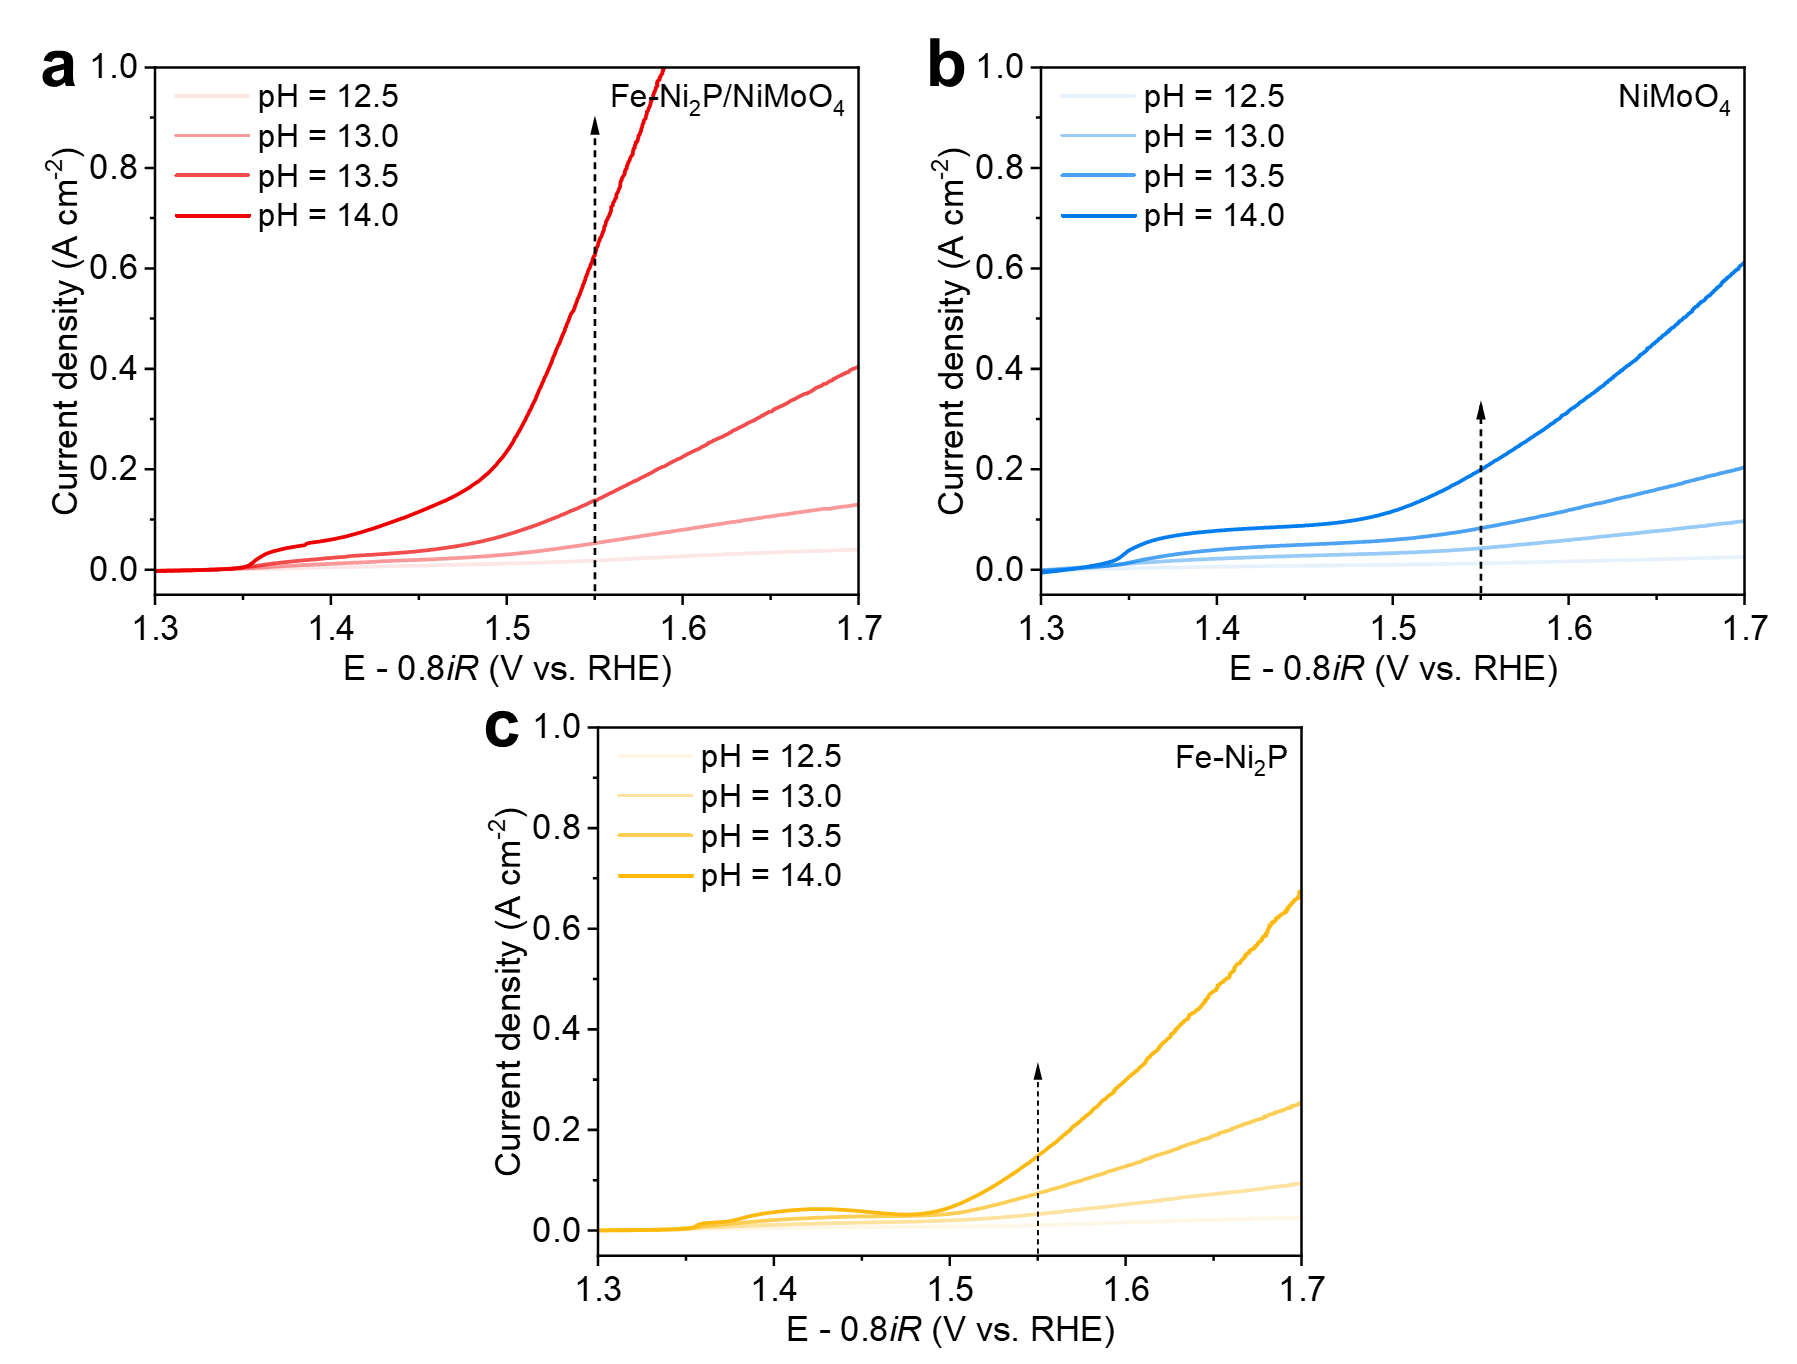


**Supplementary Fig. 38.** OER LSV curves with 80% iR compensation of **a** Fe-Ni2P/NiMoO4, **b** NiMoO4, and **c** Fe-Ni2P in the KOH electrolytes with pH = 12.5, 13.0, 13.5, and 14.0.


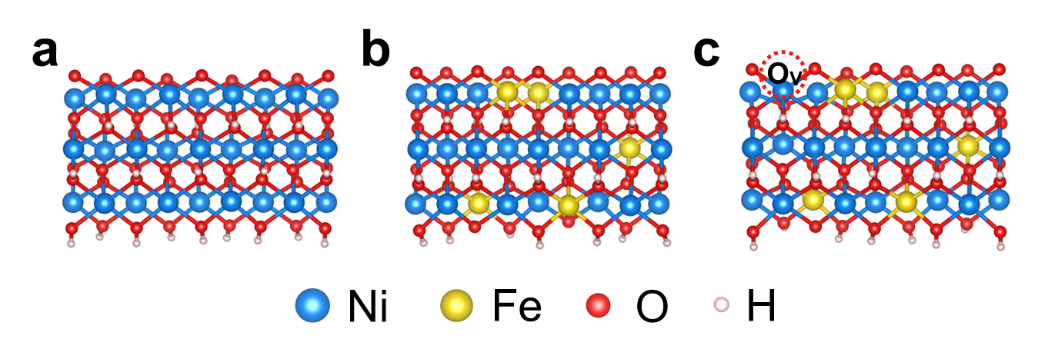


**Supplementary Fig. 39.** The theoretical structure models of **a** NiOOH, **b** Ni(Fe)OOH, and **c** OV-Ni(Fe)OOH.


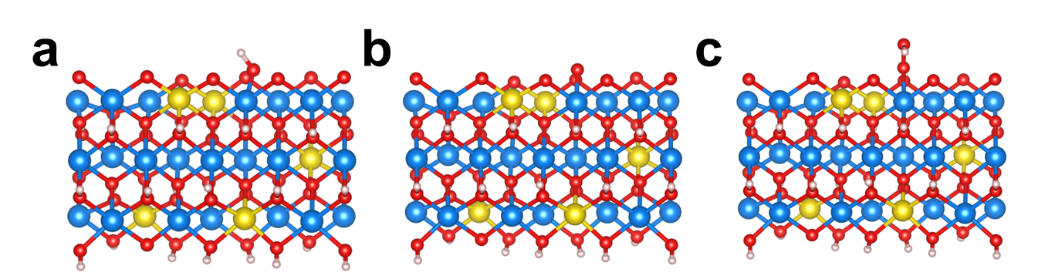


**Supplementary Fig. 40.** The theoretical structure models of AEM pathway on Ni site of OV-Ni(Fe)OOH involved the adsorption of **a** *OH, **b** *O, and **c** *OOH.


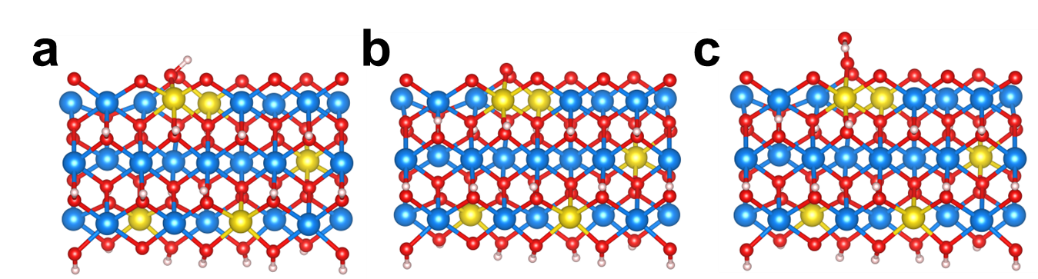


**Supplementary Fig. 41.** The theoretical structure models of AEM pathway on Fe site of OV-Ni(Fe)OOH involved the adsorption of **a** *OH, **b** *O, and **c** *OOH.


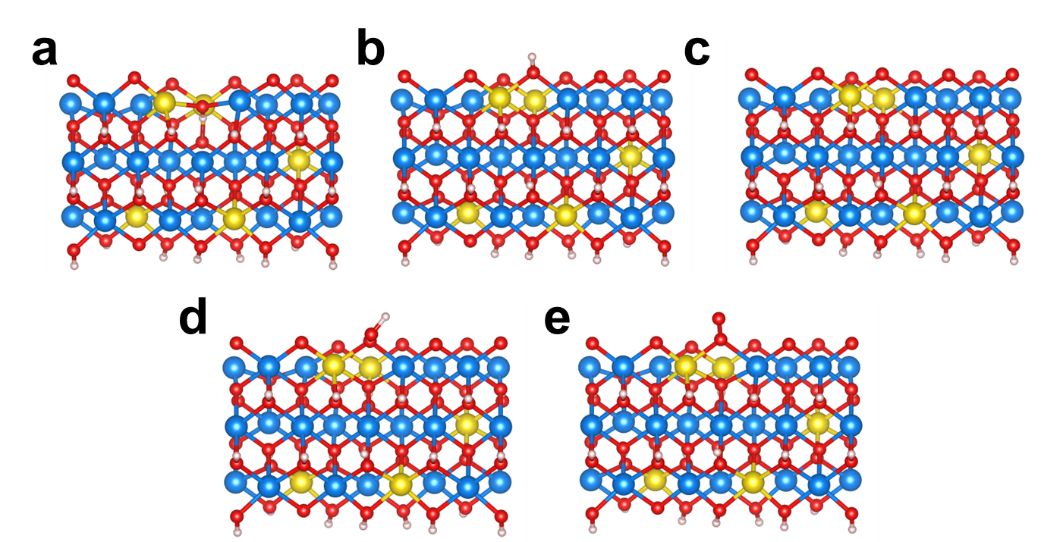


**Supplementary Fig. 42.** The theoretical structure models of LOM pathway on O site of OV-Ni(Fe)OOH involved the adsorption of **a** *OV, **b** *OH, **c** *O, **d** *OOH, and **e** *OO.


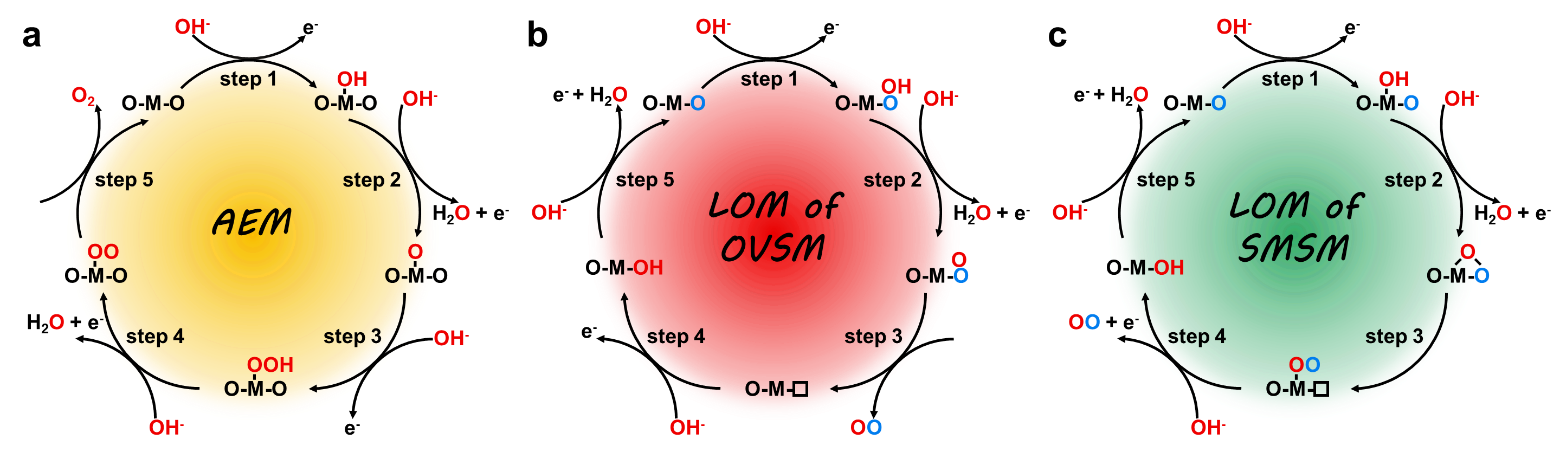


**Supplementary Fig. 43.** Schematic illustration of the **a** AEM, **b** LOM of oxygen-vacancy-site mechanism (OVSM), and **c** LOM of single-metal-site mechanism (SMSM).


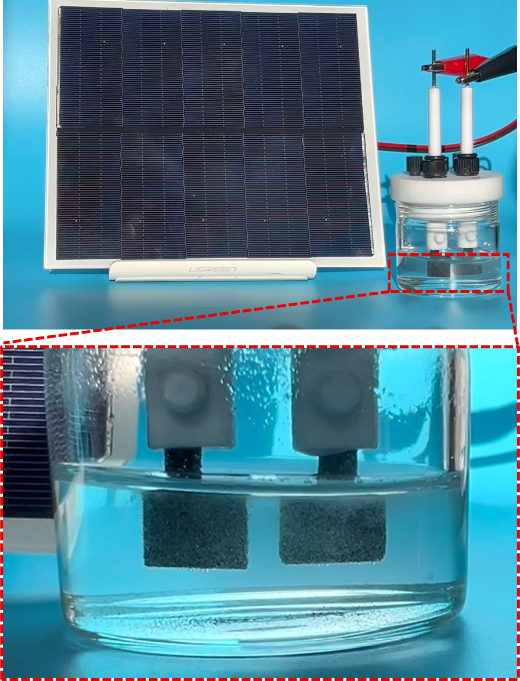


**Supplementary Fig. 44.** Digital photograph of the electrocatalytic powered by the solar panels (anode: Fe-Ni2P/NiMoO4, cathode: MoNi4).

**Supplementary Table 1.** Quantitative analysis of different oxygen species of R-Fe-Ni2P/NiMoO4, R-Fe-Ni2P, and R-NiMoO4 based on the fitting results of O 1*s* XPS spectra in Fig. 2m.


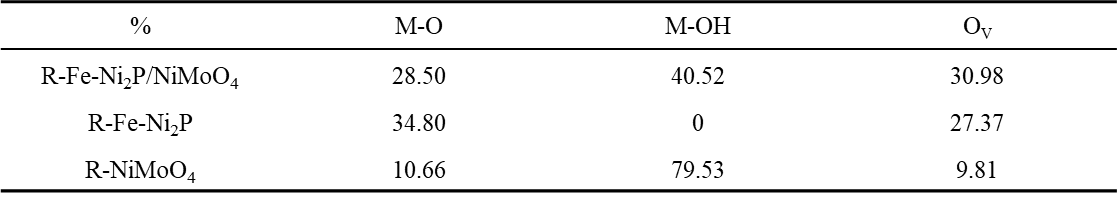


**Supplementary Table 2.** The fitted parameters of the EIS data of obtained samples in 1 M KOH solution.


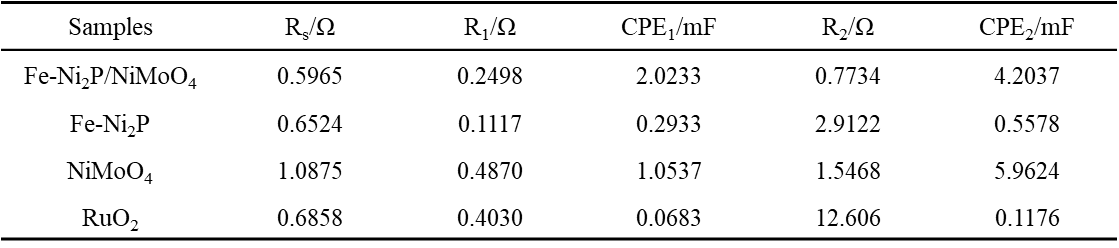


**Supplementary Table 3.** The fitted parameters of the EIS data of obtained samples in 1 M KOH + 0.5 M NaCl solution.


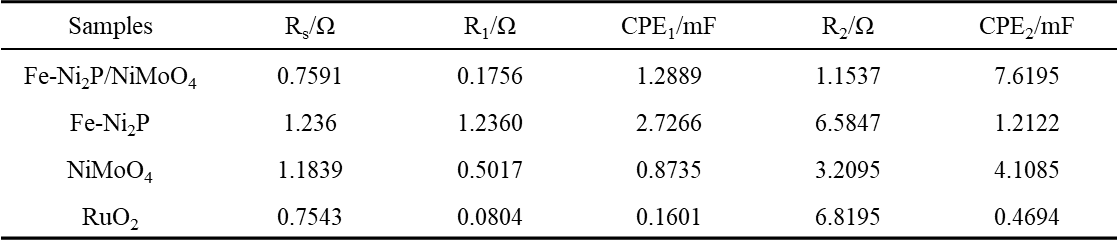


**Supplementary Table 4.** The fitted parameters of the EIS data of obtained samples in 1 M KOH + seawater solution.


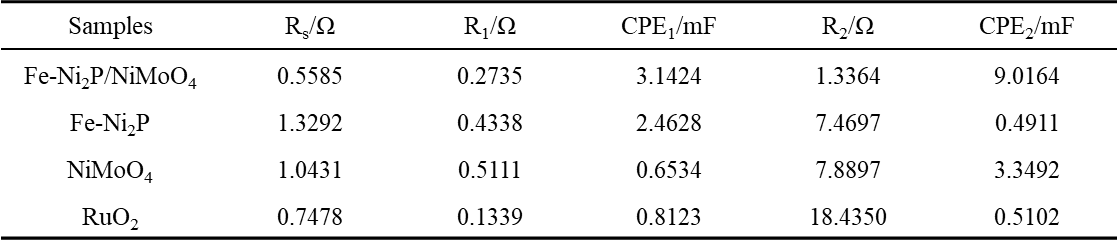


**Supplementary Table 5.** The calculated data of corrosion potential and corrosion current density for obtained samples.


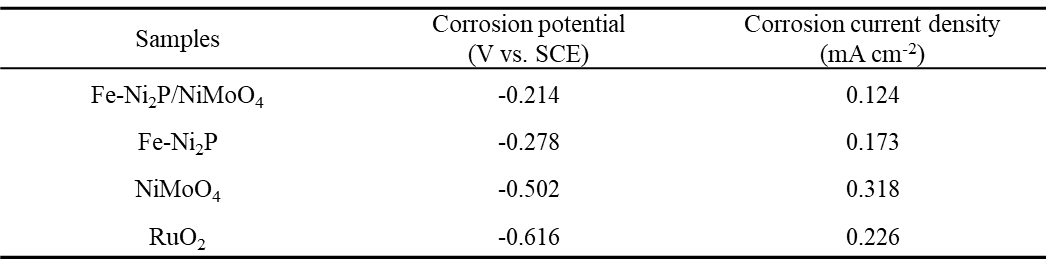


**References**

1. Perdew, J. P., Burke, K. & Ernzerhof, M. Generalized gradient approximation made simple. *Phys. Rev. Lett.* **77**, 3865-3868 (1996).

2. Kohn, W. & Sham, L. J. Self-consistent equations including exchange and correlation effects. *Physical Review*. **140**, A1133-A1138 (1965).

3. Raybaud, P., Hafner, J., Kresse, G., Kasztelan, S. & Toulhoat, H. Ab initio study of the H2-H2S/MoS2 gas-solid interface: The nature of the catalytically active sites. *J. Catal.* **189**, 129-146 (2000).

4. Kresse, G. & Joubert, D. From ultrasoft pseudopotentials to the projector augmented-wave method. *Phys. Rev. B*. **59**, 1758-1775 (1999).

5. Blöchl, P. E. Projector augmented-wave method. *Phys. Rev. B*. **50**, 17953-17979 (1994).

6. Grimme, S., Antony, J., Ehrlich, S. & Krieg, H. A consistent and accurate ab initio parametrization of density functional dispersion correction (DFT-D) for the 94 elements H-Pu. *J. Chem. Phys.* **132**, 154104 (2010).

7. Grimme, S., Ehrlich, S. & Goerigk, L. Effect of the damping function in dispersion corrected density functional theory. *J. Comput. Chem.* **32**, 1456-1465 (2011).
